# Supplementary material for: The use of enaminones and enamines as effective synthons for MSA-catalyzed regioselective synthesis of 1,3,4-tri- and 1,3,4,5-tetrasubstituted pyrazoles
Source: Royal Society of Chemistry journal article supplement (doi:10.1039/c9nj03701b), 2019-01-01
Supplement: c9nj03701b1.pdf [file c9nj03701b1.pdf]

## Electronic Supplementary Information

### **The use of Enaminones and Enamines as effective synthons for MSA-catalyzed regioselective synthesis of 1,3,4-Tri- and 1,3,4,5-Tetrasubstituted Pyrazoles**

Liancheng Duan, Hui Zhou, Yucheng Gu, Ping Gong\*, Mingze Qin\*

Key Laboratory of Structure-based Drug Design and Discovery (Shenyang Pharmaceutical University), Ministry of Education, 103 Wenhua Road, Shenhe District, Shenyang 110016, People's Republic of China

Syngenta Jealott's Hill International Research Center, Bracknell, Berkshire RG42 6EY, U.K.

## 1. General Information

Unless otherwise noted, all reagents and solvents were obtained from commercial sources and used without further purification. Solvents were dried using standard methods and distilled before use. Reactions were monitored by thin-layer chromatography (TLC) on silica plates (F-254) and visualized under UV light. All  $^1\text{H}$  NMR and  $^{13}\text{C}$  NMR spectra were recorded on Bruker ARX-400, 400 MHz spectrometers with TMS as an internal standard. The peak patterns are indicated as follows: s, singlet; d, doublet; t, triplet; m, multiplet; q, quartet. The coupling constants,  $J$ , are reported in hertz (Hz). HRMS analysis was performed on a Q-TOF mass analyzer using the ESI ionization method. Column chromatography was run on silica gel (200-300 mesh) from Qingdao Ocean Chemicals (Qingdao, Shandong, China).

## 2. General Procedure and Product Characterization

### 2.1 General procedure for the synthesis of 1 and 2

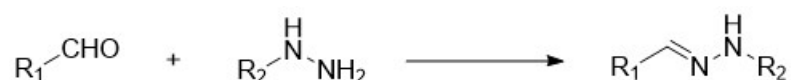

Typical Procedure for the Synthesis of **1**: Aldehyde (1.0 equiv.) was added to an ethanol solution of Hydrazine (1.0 equiv.). After the reaction mixture was heated under reflux for 6 hours. The precipitate was collected on a Büchner funnel. The crude product was purified by recrystallization from ethanol and washed with diethyl ether<sup>[1]</sup>.

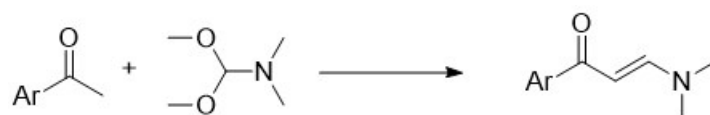

Typical Procedure for the Synthesis of **2**: Aryl ketones (1.0 equiv.) and N,N-dimethylformamide dimethyl acetal (DMF-DMA) (2.0 equiv.) were refluxed until the starting materials were consumed, as determined by thin-layer chromatography (TLC), then left to cool to room temperature, the precipitate was collected by filtration, and recrystallized from ethanol. Compounds 2m–2p were prepared by literature procedures<sup>[2-6]</sup>.

### 2.2 The Optimal Experimental Conditions

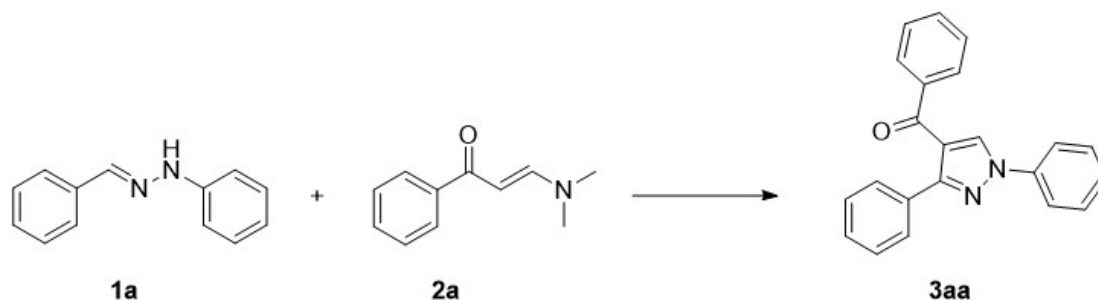

Representative procedure for the synthesis of (1,3-diphenyl-1H-pyrazol-4-yl)(phenyl)methanone (**3aa**): Corresponding Hydrazones **1a** (0.1 mmol, 1.0 equiv.), (E)-3-(dimethylamino)-1-phenylprop-2-en-1-one **2a** (0.1 mmol, 1.0 equiv.) were added to a 10 mL round-bottom flask followed by the adding of MSA (1.0 equiv.) in DCM (3 mL), and the reaction mixture was stirred at room temperature in air for 5 h. After the reaction was complete (monitored by TLC), the solvent was removed to give the crude product, which was purified by column chromatography on silica gel with a mixture of hexane/dichloromethane (1:1, v/v) to afford the desired product **3aa**.

### 2.3 Product Characterization

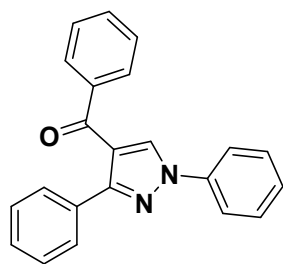

**3aa, 73 %**

#### (1,3-diphenyl-1H-pyrazol-4-yl)(phenyl)methanone(**3aa**)

Yield: 73% (white solid); mp 143–145°C; <sup>1</sup>H NMR (400 MHz, DMSO-*d*<sub>6</sub>) δ 8.97 (s, 1H), 8.01 (d, J = 7.8 Hz, 2H), 7.89 (d, J = 7.4 Hz, 2H), 7.73 – 7.62 (m, 3H), 7.60 – 7.49 (m, 4H), 7.45 – 7.34 (m, 4H). <sup>13</sup>C NMR (101 MHz, DMSO-*d*<sub>6</sub>) δ 189.64, 153.26, 139.32, 138.75, 133.89, 133.36, 132.56, 130.04, 129.88, 129.07, 128.98, 128.92, 128.57, 127.76, 120.76, 119.69. HRMS (ESI-Q-TOF, m/z) calcd for C<sub>22</sub>H<sub>16</sub>N<sub>2</sub>O [M + H]<sup>+</sup>: 325.3830, found [M + H]<sup>+</sup>: 325.3836.

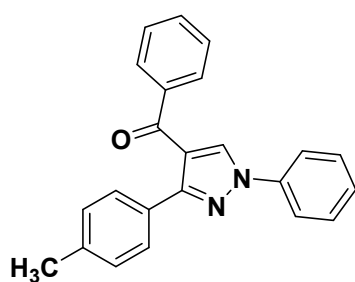

**3ab, 70%**

#### Phenyl(1-phenyl-3-(p-tolyl)-1H-pyrazol-4-yl)methanone(**3ab**)

Yield: 70% (white solid); mp 145–147°C; <sup>1</sup>H NMR (400 MHz, DMSO-*d*<sub>6</sub>) δ 8.94 (s, 1H), 7.99 (d, J = 8.0 Hz, 2H), 7.89 (d, J = 7.4 Hz, 2H), 7.65 (t, J = 7.4 Hz, 1H), 7.60 – 7.50 (m, 6H), 7.39 (t, J = 7.4 Hz, 1H), 7.20 (d, J = 8.0 Hz, 2H), 2.33 (s, 3H). <sup>13</sup>C NMR (101 MHz, DMSO-*d*<sub>6</sub>) δ 189.69, 153.21, 139.34, 138.81, 138.33, 133.83, 133.34, 130.02, 129.88, 129.71, 129.15, 129.08, 128.85, 127.68,

120.63, 119.64, 21.33. HRMS (ESI-Q-TOF, m/z) calcd for C<sub>23</sub>H<sub>18</sub>N<sub>2</sub>O [M + H]<sup>+</sup>: 339.1430, found [M + H]<sup>+</sup>: 339.3214.

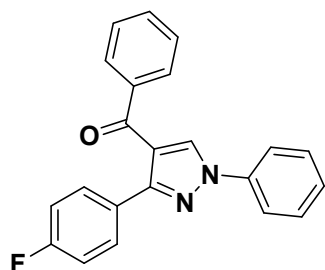

**3ac, 63%**

**(3-(4-fluorophenyl)-1-phenyl-1H-pyrazol-4-yl)(phenyl)methanone (3ac)**

Yield: 63% (white solid); mp 153–155°C; <sup>1</sup>H NMR (400 MHz, DMSO-*d*<sub>6</sub>) δ 8.97 (s, 1H), 8.00 (d, J = 7.9 Hz, 2H), 7.89 (d, J = 7.3 Hz, 2H), 7.75 (dd, J = 8.6, 5.6 Hz, 2H), 7.66 (t, J = 7.4 Hz, 1H), 7.54 (q, J = 7.8 Hz, 4H), 7.41 (t, J = 7.4 Hz, 1H), 7.24 (t, J = 8.9 Hz, 2H). <sup>13</sup>C NMR (101 MHz, DMSO-*d*<sub>6</sub>) δ 189.53, 152.38, 139.26, 138.78, 134.14, 133.34, 131.23, 131.15, 130.04, 129.88, 129.08, 127.83, 120.61, 119.74, 115.60, 115.38. HRMS (ESI-Q-TOF, m/z) calcd for C<sub>22</sub>H<sub>15</sub>FN<sub>2</sub>O [M + H]<sup>+</sup>: 343.1268, found [M + H]<sup>+</sup>: 343.3736.

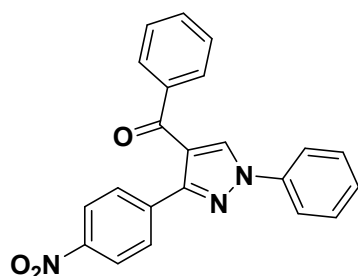

**3ad, 54%**

**(3-(4-nitrophenyl)-1-phenyl-1H-pyrazol-4-yl)(phenyl)methanone (3ad)**

Yield: 54% (yellow solid); mp 169–172°C; <sup>1</sup>H NMR (400 MHz, DMSO-*d*<sub>6</sub>) δ 9.05 (s, 1H), 8.27 (d, J = 8.8 Hz, 2H), 8.01 (dd, J = 14.2, 8.3 Hz, 4H), 7.95 (d, J = 7.3 Hz, 2H), 7.69 (t, J = 7.4 Hz, 1H), 7.57 (td, J = 7.6, 3.0 Hz, 4H), 7.43 (t, J = 7.4 Hz, 1H). <sup>13</sup>C NMR (151 MHz, DMSO-*d*<sub>6</sub>) δ 189.27, 151.26, 147.70, 139.14, 139.07, 138.56, 134.59, 133.53, 130.14, 130.06, 129.95, 129.14, 128.14, 123.79, 121.24, 119.95. HRMS (ESI-Q-TOF, m/z) calcd for C<sub>22</sub>H<sub>15</sub>N<sub>3</sub>O<sub>3</sub> [M + H]<sup>+</sup>: 370.1223, found [M + H]<sup>+</sup>: 370.3800.

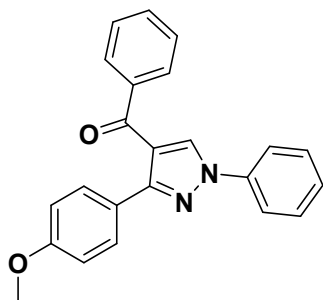

**3ae, 64%**

**(3-(4-methoxyphenyl)-1-phenyl-1H-pyrazol-4-yl)(phenyl)methanone (3ae)**

Yield: 64% (white solid); mp 131–133°C; <sup>1</sup>H NMR (400 MHz, DMSO-*d*<sub>6</sub>) δ 8.92 (s, 1H), 7.99 (d, J = 7.8 Hz, 2H), 7.89 (d, J = 7.2 Hz, 2H), 7.65 (dt, J = 7.3, 2.7 Hz, 3H), 7.53 (q, J = 7.3 Hz, 4H), 7.39 (t, J = 7.4 Hz, 1H), 6.99 – 6.93 (m, 2H), 3.78 (s, 3H). <sup>13</sup>C NMR (101 MHz, DMSO-*d*<sub>6</sub>) δ 189.73, 159.97, 153.01, 139.34, 138.90, 133.89, 133.29, 130.32, 130.01, 129.87, 129.07, 127.64, 124.92, 120.43, 119.61, 114.01, 55.62. HRMS (ESI-Q-TOF, m/z) calcd for C<sub>23</sub>H<sub>18</sub>N<sub>2</sub>O<sub>2</sub> [M + H]<sup>+</sup>: 355.1268, found [M + H]<sup>+</sup>: 355.4090.

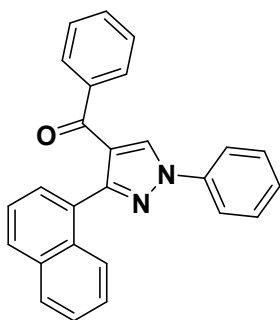

**3af, 68%**

**(3-(naphthalen-1-yl)-1-phenyl-1H-pyrazol-4-yl)(phenyl)methanone (3af)**

Yield: 68% (white solid); mp 134–136°C; <sup>1</sup>H NMR (400 MHz, DMSO-*d*<sub>6</sub>) δ 9.16 (s, 1H), 8.05 (d, J = 8.0 Hz, 2H), 7.97 (d, J = 7.8 Hz, 2H), 7.90 (d, J = 8.4 Hz, 1H), 7.82 (d, J = 7.6 Hz, 2H), 7.60 – 7.47 (m, 6H), 7.43 (q, J = 7.4 Hz, 4H). <sup>13</sup>C NMR (101 MHz, DMSO-*d*<sub>6</sub>) δ 188.82, 152.80, 139.40, 138.66, 133.51, 133.26, 133.01, 131.94, 130.86, 130.08, 129.47, 129.10, 128.87, 128.63, 128.53, 127.83, 126.83, 126.28, 125.73, 125.58, 122.70, 119.78. HRMS (ESI-Q-TOF, m/z) calcd for C<sub>26</sub>H<sub>18</sub>N<sub>2</sub>O [M + H]<sup>+</sup>: 375.1419, found [M + H]<sup>+</sup>: 375.4340.

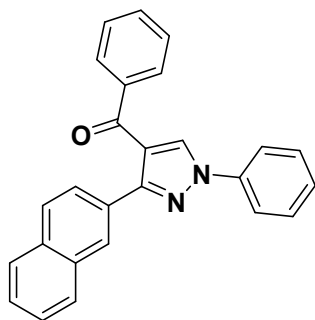

**3ag, 70%**

**(3-(naphthalen-2-yl)-1-phenyl-1H-pyrazol-4-yl)(phenyl)methanone (3ag)**

Yield: 70% (white solid); mp 133–135°C; <sup>1</sup>H NMR (400 MHz, DMSO-*d*<sub>6</sub>) δ 9.03 (s, 1H), 8.27 (s, 1H), 8.05 (d, *J* = 7.9 Hz, 2H), 7.98 – 7.89 (m, 5H), 7.81 (dd, 1H), 7.63 (t, *J* = 7.4 Hz, 1H), 7.60 – 7.49 (m, 6H), 7.42 (t, *J* = 7.4 Hz, 1H). <sup>13</sup>C NMR (101 MHz, DMSO-*d*<sub>6</sub>) δ 189.66, 153.23, 139.34, 138.84, 134.16, 133.35, 133.20, 133.09, 130.07, 129.91, 129.09, 128.68, 128.07, 127.99, 127.94, 127.83, 126.99, 126.91, 126.81, 121.00, 119.77. HRMS (ESI-Q-TOF, *m/z*) calcd for C<sub>26</sub>H<sub>18</sub>N<sub>2</sub>O [M + H]<sup>+</sup>: 375.1428, found [M + H]<sup>+</sup>: 375.4490.

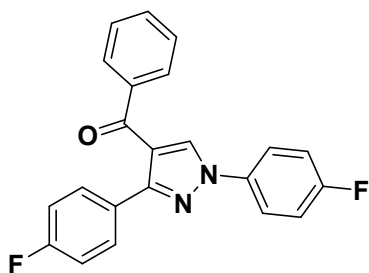

**3ah, 57%**

**(1,3-bis(4-fluorophenyl)-1H-pyrazol-4-yl)(phenyl)methanone (3ah)**

Yield: 57% (white solid); mp 146–148°C; <sup>1</sup>H NMR (400 MHz, DMSO-*d*<sub>6</sub>) δ 8.96 (s, 1H), 8.08 – 8.01 (m, 2H), 7.93 – 7.87 (m, 2H), 7.78 – 7.72 (m, 2H), 7.66 (t, *J* = 7.4 Hz, 1H), 7.53 (t, *J* = 7.7 Hz, 2H), 7.44 – 7.36 (m, 2H), 7.27 – 7.19 (m, 2H). <sup>13</sup>C NMR (101 MHz, DMSO-*d*<sub>6</sub>) δ 189.46, 152.43, 138.76, 134.38, 133.34, 131.24, 131.15, 129.87, 129.07, 121.98, 121.90, 120.60, 116.90, 116.67, 115.59, 115.37. HRMS (ESI-Q-TOF, *m/z*) calcd for C<sub>22</sub>H<sub>14</sub>F<sub>2</sub>N<sub>2</sub>O [M + H]<sup>+</sup>: 361.1074, found [M + H]<sup>+</sup>: 361.3438.

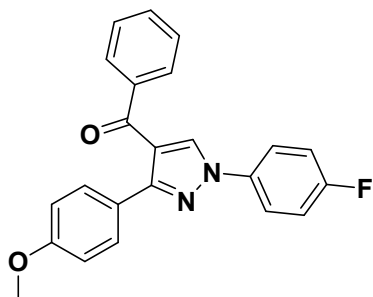

**3ai, 59%**

**(1-(4-fluorophenyl)-3-(4-methoxyphenyl)-1H-pyrazol-4-yl)(phenyl)methanone (3ai)**

Yield: 59% (white solid); mp 158–161°C; <sup>1</sup>H NMR (400 MHz, DMSO-*d*<sub>6</sub>) δ 8.91 (s, 1H), 8.03 (ddt, J = 8.2, 5.5, 2.8 Hz, 2H), 7.92 – 7.86 (m, 2H), 7.65 (d, J = 8.6 Hz, 3H), 7.53 (t, J = 7.7 Hz, 2H), 7.43 – 7.35 (m, 2H), 6.98 – 6.92 (m, 2H), 3.78 (s, 3H). <sup>13</sup>C NMR (101 MHz, DMSO-*d*<sub>6</sub>) δ 189.67, 159.99, 153.07, 138.88, 134.14, 133.29, 130.32, 129.86, 129.06, 124.84, 121.83, 121.75, 120.42, 116.87, 116.64, 114.00, 55.62. HRMS (ESI-Q-TOF, m/z) calcd for C<sub>23</sub>H<sub>17</sub>FN<sub>2</sub>O<sub>2</sub> [M + H]<sup>+</sup>: 373.1374, found [M + H]<sup>+</sup>: 373.3996.

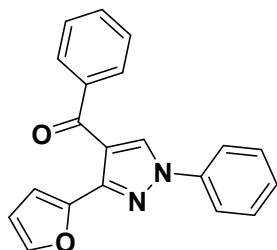

**3aj, 76%**

**(3-(furan-2-yl)-1-phenyl-1H-pyrazol-4-yl)(phenyl)methanone (3aj)**

Yield: 76% (brown solid); mp 119–121°C; <sup>1</sup>H NMR (400 MHz, DMSO-*d*<sub>6</sub>) δ 8.97 (s, 1H), 8.03 – 7.97 (m, 2H), 7.95 – 7.88 (m, 2H), 7.77 (d, J = 1.0 Hz, 1H), 7.72 – 7.63 (m, 1H), 7.60 – 7.51 (m, 4H), 7.41 (t, J = 7.4 Hz, 1H), 7.22 (dd, J = 3.4, 0.5 Hz, 1H), 6.61 (dd, J = 3.4, 1.8 Hz, 1H). <sup>13</sup>C NMR (151 MHz, DMSO-*d*<sub>6</sub>) δ 188.99, 146.65, 144.12, 144.02, 139.19, 138.9, 133.93, 133.27, 130.03, 129.73, 129.12, 127.90, 120.06, 119.78, 111.94, 111.79. HRMS (ESI-Q-TOF, m/z) calcd for C<sub>20</sub>H<sub>14</sub>N<sub>2</sub>O<sub>2</sub> [M + H]<sup>+</sup>: 315.1155, found [M + H]<sup>+</sup>: 315.3440.

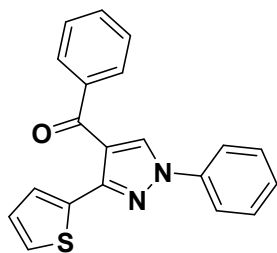

**3ak, 74%**

**Phenyl(1-phenyl-3-(thiophen-2-yl)-1H-pyrazol-4-yl)methanone (3ak)**

Yield: 74% (brown solid); mp 98–100°C; <sup>1</sup>H NMR (400 MHz, DMSO-*d*<sub>6</sub>) δ 8.95 (s, 1H), 8.02 – 7.92 (m, 4H), 7.88 (dd, *J* = 3.7, 1.0 Hz, 1H), 7.69 (t, *J* = 7.4 Hz, 1H), 7.62 (dd, *J* = 5.1, 1.0 Hz, 1H), 7.60 – 7.53 (m, 4H), 7.41 (t, *J* = 7.4 Hz, 1H), 7.13 (dd, *J* = 5.0, 3.7 Hz, 1H). <sup>13</sup>C NMR (151 MHz, DMSO-*d*<sub>6</sub>) δ 189.36, 147.48, 139.11, 139.04, 134.63, 134.37, 133.30, 130.03, 129.85, 129.14, 128.73, 127.97, 127.90, 127.80, 119.90, 119.77. HRMS (ESI-Q-TOF, *m/z*) calcd for C<sub>20</sub>H<sub>14</sub>N<sub>2</sub>OS [M + H]<sup>+</sup>: 331.1127, found [M + H]<sup>+</sup>: 315.4064.

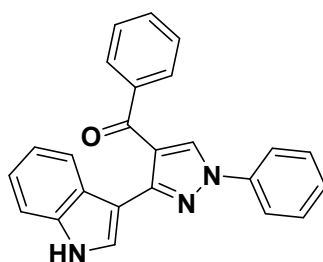

**3al, 62%**

**(3-(1H-indol-3-yl)-1-phenyl-1H-pyrazol-4-yl)(phenyl)methanone (3al)**

Yield: 62% (yellow solid); mp 209–211°C; <sup>1</sup>H NMR (400 MHz, DMSO-*d*<sub>6</sub>) δ 11.44 (s, 1H), 8.89 (s, 1H), 8.43 (d, *J* = 8.3 Hz, 1H), 8.38 (d, *J* = 2.5 Hz, 1H), 8.07 (d, *J* = 7.8 Hz, 2H), 7.93 (d, *J* = 7.3 Hz, 2H), 7.67 (t, *J* = 7.3 Hz, 1H), 7.57 (q, *J* = 7.4 Hz, 4H), 7.48 (d, *J* = 6.7 Hz, 1H), 7.40 (t, *J* = 7.4 Hz, 1H), 7.24 – 7.12 (m, 2H). <sup>13</sup>C NMR (101 MHz, DMSO-*d*<sub>6</sub>) δ 189.88, 149.56, 139.94, 139.46, 136.64, 134.09, 132.91, 130.07, 129.80, 129.07, 128.36, 127.36, 126.32, 122.26, 122.18, 120.40, 120.22, 119.33, 112.09, 107.46. HRMS (ESI-Q-TOF, *m/z*) calcd for C<sub>24</sub>H<sub>17</sub>N<sub>3</sub>O [M + H]<sup>+</sup>: 364.1427, found [M + H]<sup>+</sup>: 364.4240.



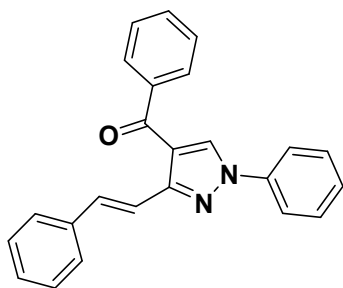

**3am, 64%**

**(E)-phenyl(1-phenyl-3-styryl-1H-pyrazol-4-yl)methanone (3am)**

Yield:64% (light yellow solid); mp 150–152°C; <sup>1</sup>H NMR (400 MHz, DMSO-*d*<sub>6</sub>) δ 8.92 (s, 1H), 8.03 (d, J = 7.7 Hz, 2H), 7.97 – 7.91 (m, 2H), 7.70 (t, J = 7.4 Hz, 1H), 7.65 – 7.50 (m, 8H), 7.46 – 7.38 (m, 3H), 7.33 (t, J = 7.3 Hz, 1H). <sup>13</sup>C NMR (151 MHz, DMSO-*d*<sub>6</sub>) δ 189.65, 151.28, 139.41, 139.31, 136.93, 133.98, 132.99, 132.59, 129.98, 129.50, 129.33, 129.15, 128.79, 127.88, 127.20, 120.59, 119.95, 118.90. HRMS (ESI-Q-TOF, m/z) calcd for C<sub>24</sub>H<sub>18</sub>N<sub>2</sub>O [M + H]<sup>+</sup>: 351.1429, found [M + H]<sup>+</sup>: 351.4210.

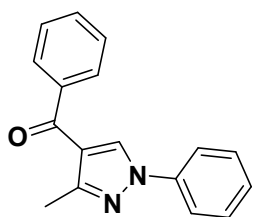

**3an, 76%**

**(3-methyl-1-phenyl-1H-pyrazol-4-yl)(phenyl)methanone (3an)**

Yield:76% (yellow solid); mp 80–82°C; <sup>1</sup>H NMR (400 MHz, DMSO-*d*<sub>6</sub>) δ 8.83 (s, 1H), 7.93 (d, J = 7.9 Hz, 2H), 7.88 (d, J = 7.4 Hz, 2H), 7.67 (t, J = 7.4 Hz, 1H), 7.56 (t, J = 7.6 Hz, 2H), 7.51 (t, J = 7.9 Hz, 2H), 7.36 (t, J = 7.4 Hz, 1H), 2.51 (s, 3H). <sup>13</sup>C NMR (151 MHz, DMSO-*d*<sub>6</sub>) δ 189.49, 152.37, 139.53, 139.33, 133.38, 132.70, 129.91, 129.28, 129.09, 127.42, 120.60, 119.55, 14.31. HRMS (ESI-Q-TOF, m/z) calcd for C<sub>17</sub>H<sub>14</sub>N<sub>2</sub>O [M + H]<sup>+</sup>: 263.1216, found [M + H]<sup>+</sup>: 263.3127.

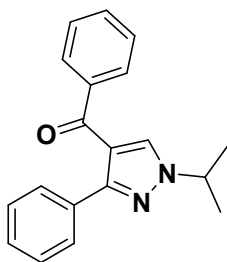

**3ao, 72%**

**(1-isopropyl-3-phenyl-1H-pyrazol-4-yl)(phenyl)methanone (3ao)**

Yield:72% (yellow solid); mp 72–75°C; <sup>1</sup>H NMR (400 MHz, DMSO-*d*<sub>6</sub>) δ 8.25 (s, 1H), 7.78 (d, J = 7.2 Hz, 2H), 7.61 (dd, J = 8.5, 4.9 Hz, 3H), 7.49 (t, J = 7.6 Hz, 2H), 7.38 – 7.29 (m, 3H), 4.62 (hept, J = 6.6 Hz, 1H), 1.50 (d, J = 6.7 Hz, 6H). <sup>13</sup>C NMR (151 MHz, DMSO-*d*<sub>6</sub>) δ 189.51, 151.69, 139.47, 134.86, 133.40, 132.76, 129.68, 129.46, 128.95, 128.89, 128.31, 118.25, 54.14, 22.82. HRMS (ESI-Q-TOF, m/z) calcd for C<sub>19</sub>H<sub>18</sub>N<sub>2</sub>O [M + H]<sup>+</sup>: 291.1429, found [M + H]<sup>+</sup>: 291.3764.

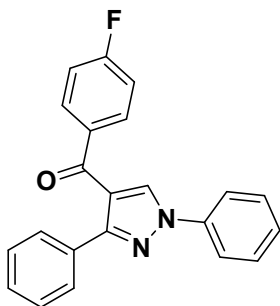

**3ap, 70%**

**(1,3-diphenyl-1H-pyrazol-4-yl)(4-fluorophenyl)methanone (3ap)**

Yield:70% (white solid); mp 131–133°C; <sup>1</sup>H NMR (400 MHz, DMSO-*d*<sub>6</sub>) δ 9.00 (s, 1H), 8.07 – 7.91 (m, 4H), 7.71 – 7.63 (m, 2H), 7.56 (t, J = 7.8 Hz, 2H), 7.45 – 7.28 (m, 6H). <sup>13</sup>C NMR (151 MHz, DMSO-*d*<sub>6</sub>) δ 188.23, 153.22, 139.31, 135.46, 133.92, 132.78, 132.72, 132.51, 130.03, 128.99, 128.93, 128.56, 127.78, 120.65, 119.69, 116.10, 115.95. HRMS (ESI-Q-TOF, m/z) calcd for C<sub>22</sub>H<sub>15</sub>FN<sub>2</sub>O [M + H]<sup>+</sup>: 343.1266, found [M + H]<sup>+</sup>:343.4224.

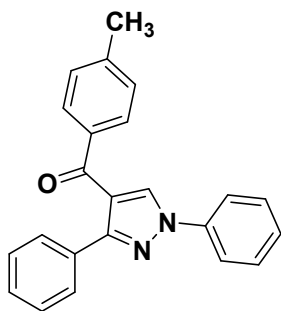

**3aq, 66%**

**(1,3-diphenyl-1H-pyrazol-4-yl)(p-tolyl)methanone (3aq)**

Yield:66% (white solid); mp 117–119°C; <sup>1</sup>H NMR (400 MHz, DMSO-*d*<sub>6</sub>) δ 8.94 (s, 1H), 8.00 (d, J = 7.8 Hz, 2H), 7.81 (d, J = 8.1 Hz, 2H), 7.68 (dd, J = 7.3, 2.2 Hz, 2H), 7.55 (t, J = 7.9 Hz, 2H), 7.40 (dd, J = 9.4, 4.4 Hz, 4H), 7.33 (d, J = 8.0 Hz, 2H), 2.39 (s, 3H). <sup>13</sup>C NMR (151 MHz, DMSO-*d*<sub>6</sub>) δ 189.33, 153.03, 143.77, 139.36, 136.19, 133.50, 132.61, 130.05, 130.02, 129.63, 128.87, 128.58, 127.68, 120.91, 119.63, 21.60. HRMS (ESI-Q-TOF, m/z) calcd for C<sub>23</sub>H<sub>18</sub>N<sub>2</sub>O [M + H]<sup>+</sup>: 339.1429, found [M + H]<sup>+</sup>:339.4221.

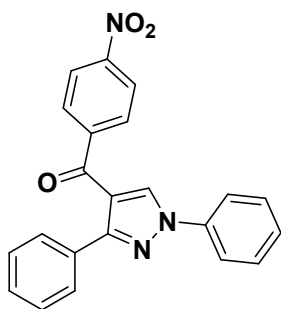

**3ar, 82%**

**(1,3-diphenyl-1H-pyrazol-4-yl)(4-nitrophenyl)methanone (3ar)**

Yield:82% (yellow solid); mp 178–181°C; <sup>1</sup>H NMR (400 MHz, DMSO-*d*<sub>6</sub>) δ 9.03 (s, 1H), 8.32 (d, J = 8.8 Hz, 2H), 8.08 (d, J = 8.8 Hz, 2H), 8.00 (d, J = 7.7 Hz, 2H), 7.73 (dd, J = 6.7, 3.0 Hz, 2H), 7.56 (t, J = 7.9 Hz, 2H), 7.42 (dd, J = 8.7, 4.8 Hz, 4H). <sup>13</sup>C NMR (101 MHz, DMSO-*d*<sub>6</sub>) δ 188.09, 153.36, 149.90, 144.28, 139.14, 135.17, 132.30, 130.98, 130.06, 129.27, 129.15, 128.53, 128.01, 124.08, 120.32, 119.79. HRMS (ESI-Q-TOF, m/z) calcd for C<sub>22</sub>H<sub>15</sub>N<sub>3</sub>O<sub>3</sub> [M + H]<sup>+</sup>: 370.1123, found [M + H]<sup>+</sup>:370.3820.

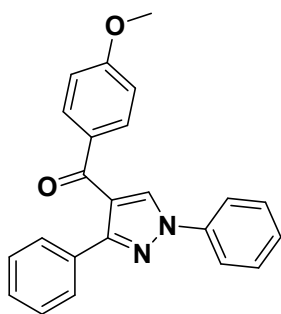

**3as, 66%**

**(1,3-diphenyl-1*H*-pyrazol-4-yl)(4-methoxyphenyl)methanone (3as)**

Yield:66% (white solid); mp 112–114°C; <sup>1</sup>H NMR (400 MHz, DMSO-*d*<sub>6</sub>) δ 8.94 (s, 1H), 8.00 (d, J = 7.7 Hz, 2H), 7.90 (d, J = 8.8 Hz, 2H), 7.70 – 7.64 (m, 2H), 7.55 (t, J = 7.9 Hz, 2H), 7.43 – 7.35 (m, 4H), 7.05 (d, J = 8.8 Hz, 2H), 3.85 (s, 3H). <sup>13</sup>C NMR (101 MHz, DMSO-*d*<sub>6</sub>) δ 188.40, 163.63, 152.80, 139.39, 133.07, 132.62, 132.34, 131.34, 130.04, 128.84, 128.77, 128.64, 127.63, 120.99, 119.55, 114.37, 56.04. HRMS (ESI-Q-TOF, m/z) calcd for C<sub>23</sub>H<sub>18</sub>N<sub>2</sub>O<sub>2</sub> [M + H]<sup>+</sup>: 355.1388, found [M + H]<sup>+</sup>:355.4282.

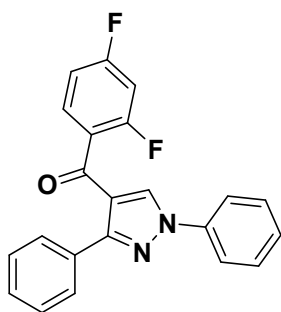

**3at, 64%**

**(2,4-difluorophenyl)(1,3-diphenyl-1*H*-pyrazol-4-yl)methanone (3at)**

Yield:64% (white solid); mp 102–104°C; <sup>1</sup>H NMR (400 MHz, DMSO-*d*<sub>6</sub>) δ 9.04 (s, 1H), 7.99 (d, J = 8.1 Hz, 2H), 7.80 – 7.63 (m, 3H), 7.55 (t, J = 7.6 Hz, 2H), 7.40 (dd, J = 8.1, 7.0 Hz, 4H), 7.29 (t, J = 10.0 Hz, 1H), 7.17 (t, J = 8.3 Hz, 1H). <sup>13</sup>C NMR (101 MHz, DMSO-*d*<sub>6</sub>) δ 185.01, 153.35, 139.07, 135.09, 133.02, 132.92, 132.19, 130.06, 129.30, 129.10, 128.40, 128.00, 125.35, 122.18, 119.68, 112.47, 112.25, 105.21. HRMS (ESI-Q-TOF, m/z) calcd for C<sub>22</sub>H<sub>14</sub>F<sub>2</sub>N<sub>2</sub>O [M + H]<sup>+</sup>: 361.1074, found [M + H]<sup>+</sup>:361.3648.

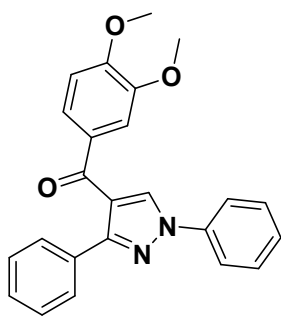

**3au, 62%**

**(3,4-dimethoxyphenyl)(1,3-diphenyl-1H-pyrazol-4-yl)methanone (3au)**

Yield:62% (white solid); mp 224–226°C; <sup>1</sup>H NMR (400 MHz, DMSO-*d*<sub>6</sub>) δ 8.98 (s, 1H), 8.01 (d, J = 7.9 Hz, 2H), 7.70 – 7.61 (m, 2H), 7.56 (t, J = 6.7 Hz, 3H), 7.48 – 7.30 (m, 5H), 7.06 (d, J = 8.4 Hz, 1H), 3.85 (s, 3H), 3.78 (s, 3H). <sup>13</sup>C NMR (101 MHz, DMSO-*d*<sub>6</sub>) δ 188.38, 153.58, 152.75, 149.02, 139.40, 133.06, 132.66, 131.21, 130.06, 128.84, 128.77, 128.64, 127.62, 125.04, 121.05, 119.52, 112.09, 111.35, 56.26, 55.95. HRMS (ESI-Q-TOF, m/z) calcd for C<sub>24</sub>H<sub>20</sub>N<sub>2</sub>O<sub>3</sub> [M + H]<sup>+</sup>: 385.1474, found [M + H]<sup>+</sup>:385.4353.

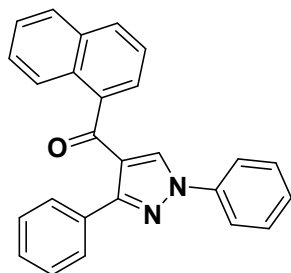

**3av, 71%**

**(1,3-diphenyl-1H-pyrazol-4-yl)(naphthalen-1-yl)methanone (3av)**

Yield:71% (white solid); mp 119–121°C; <sup>1</sup>H NMR (400 MHz, DMSO-*d*<sub>6</sub>) δ 8.85 (s, 1H), 8.26 (dd, J = 8.2, 4.9 Hz, 1H), 8.10 (d, J = 8.3 Hz, 1H), 8.05 – 8.00 (m, 1H), 7.98 – 7.93 (m, 2H), 7.84 (dd, J = 7.1, 0.9 Hz, 1H), 7.78 – 7.72 (m, 2H), 7.63 – 7.57 (m, 2H), 7.56 – 7.47 (m, 3H), 7.41 – 7.32 (m, 4H). <sup>13</sup>C NMR (101 MHz, DMSO-*d*<sub>6</sub>) δ 190.8, 153.68, 139.1, 137.29, 135.22, 133.84, 132.58, 131.97, 130.55, 130.01, 129.27, 128.98, 128.93, 128.88, 128.34, 127.87, 127.80, 126.86, 125.57, 125.29, 122.99, 119.70. HRMS (ESI-Q-TOF, m/z) calcd for C<sub>26</sub>H<sub>18</sub>N<sub>2</sub>O [M + H]<sup>+</sup>: 375.1439, found [M + H]<sup>+</sup>:375.4430.

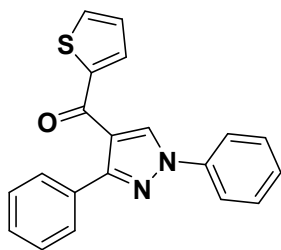

**3aw, 81%**

**(1,3-diphenyl-1H-pyrazol-4-yl)(thiophen-2-yl)methanone (3aw)**

Yield:81% (brown solid); mp 187–189°C; <sup>1</sup>H NMR (400 MHz, DMSO-*d*<sub>6</sub>) δ 9.16 (s, 1H), 8.09 (dd, J = 4.9, 1.0 Hz, 1H), 8.03 (d, J = 7.7 Hz, 2H), 7.97 (dd, J = 3.8, 1.0 Hz, 1H), 7.72 (dd, J = 7.7, 1.8 Hz, 2H), 7.57 (t, J = 8.0 Hz, 2H), 7.47 – 7.38 (m, 4H), 7.28 (dd, J = 4.9, 3.9 Hz, 1H). <sup>13</sup>C NMR (101 MHz, DMSO-*d*<sub>6</sub>) δ 181.19, 152.72, 145.02, 139.35, 135.95, 135.65, 133.24, 132.48, 130.04, 129.34, 128.99, 128.86, 128.67, 127.78, 120.31, 119.75. HRMS (ESI-Q-TOF, m/z) calcd for C<sub>20</sub>H<sub>14</sub>N<sub>2</sub>OS [M + H]<sup>+</sup>: 331.0827, found [M + H]<sup>+</sup>:331.4050.

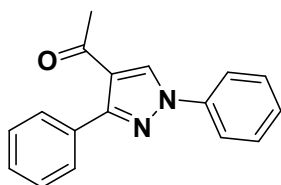

**3ax, 43%**

**1-(1,3-diphenyl-1H-pyrazol-4-yl)ethan-1-one (3ax)**

Yield:43% (white solid); mp 100–103°C; <sup>1</sup>H NMR (400 MHz, DMSO-*d*<sub>6</sub>) δ 9.35 (s, 1H), 8.05 – 7.95 (m, 2H), 7.82 – 7.73 (m, 2H), 7.58 (t, J = 8.0 Hz, 2H), 7.49 – 7.36 (m, 4H), 2.51 (s, 3H). <sup>13</sup>C NMR (151 MHz, DMSO-*d*<sub>6</sub>) δ 192.31, 152.53, 139.25, 134.84, 132.82, 130.09, 129.57, 128.98, 128.23, 127.79, 122.18, 119.47, 29.74. HRMS (ESI-Q-TOF, m/z) calcd for C<sub>17</sub>H<sub>14</sub>N<sub>2</sub>O [M + H]<sup>+</sup>: 263.1106, found [M + H]<sup>+</sup>:263.3120..

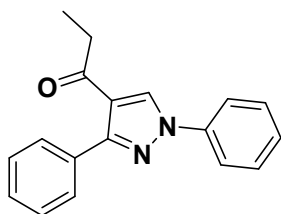

**3ay, 41%**

### 1-(1,3-diphenyl-1*H*-pyrazol-4-yl)propan-1-one (3ay)

Yield:41% (white solid); mp 98–100°C; <sup>1</sup>H NMR (400 MHz, DMSO-*d*<sub>6</sub>) δ 9.34 (s, 1H), 8.03 – 7.96 (m, 2H), 7.81 – 7.74 (m, 2H), 7.58 (dd, *J* = 10.8, 5.1 Hz, 2H), 7.48 – 7.37 (m, 4H), 2.94 (q, *J* = 7.3 Hz, 2H), 1.08 (t, *J* = 7.3 Hz, 3H). <sup>13</sup>C NMR (151 MHz, DMSO-*d*<sub>6</sub>) δ 195.41, 152.59, 139.30, 134.03, 132.93, 130.07, 129.54, 128.93, 128.22, 127.73, 121.70, 119.46, 34.30, 8.72. HRMS (ESI-Q-TOF, *m/z*) calcd for C<sub>18</sub>H<sub>16</sub>N<sub>2</sub>O [M + H]<sup>+</sup>: 277.1263, found [M + H]<sup>+</sup>:277.3390.

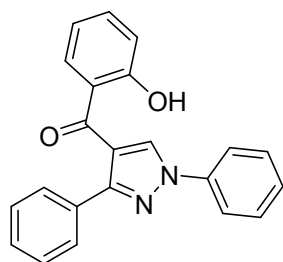

**3az, 70-80%**

### (1,3-diphenyl-1*H*-pyrazol-4-yl)(2-hydroxyphenyl)methanone (3az)

Yield:70-80% (white solid); mp 169–171°C; <sup>1</sup>H NMR (400 MHz, DMSO-*d*<sub>6</sub>) δ 11.20 (s, 1H), 8.97 (s, 1H), 8.00 (d, *J* = 7.8 Hz, 2H), 7.69 (dd, *J* = 16.0, 6.6 Hz, 3H), 7.53 (dt, *J* = 15.5, 7.5 Hz, 3H), 7.45 – 7.33 (m, 4H), 7.04 – 6.84 (m, 2H). <sup>13</sup>C NMR (151 MHz, DMSO-*d*<sub>6</sub>) δ 188.23, 153.22, 139.31, 133.92, 132.78, 132.72, 132.51, 130.03, 128.99, 128.93, 128.56, 127.78, 120.65, 119.69, 116.10, 115.95. HRMS (ESI-Q-TOF, *m/z*) calcd for C<sub>22</sub>H<sub>16</sub>N<sub>2</sub>O<sub>2</sub> [M + H]<sup>+</sup>: 341.1225, found [M + H]<sup>+</sup>:341.3820.

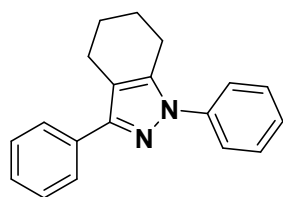

**3ba, 68%**

### 1,3-diphenyl-4,5,6,7-tetrahydro-1*H*-indazole (3ba)

Yield:68% (light yellow solid); mp 131–134°C; <sup>1</sup>H NMR (400 MHz, DMSO-*d*<sub>6</sub>) δ 7.79 – 7.75 (m, 2H), 7.61 (dd, *J* = 8.5, 1.0 Hz, 2H), 7.52 (dd, *J* = 10.6, 5.2 Hz, 2H), 7.45 (dd, *J* = 10.4, 4.7 Hz, 2H), 7.41 – 7.31 (m, 2H), 2.75 (d, *J* = 12.6 Hz, 4H), 1.77 (s, 4H). <sup>13</sup>C NMR (151 MHz, DMSO-*d*<sub>6</sub>) δ 148.44, 140.09, 134.28, 129.63, 128.99, 127.81, 127.16, 126.89, 123.29, 115.56, 23.71, 23.02, 22.71, 22.50.

HRMS (ESI-Q-TOF, m/z) calcd for  $C_{19}H_{18}N_2$   $[M + H]^+$ : 275.1671, found  $[M + H]^+$ :275.3670.

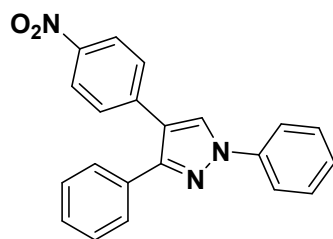

**3bb, 72%**

#### 4-(4-nitrophenyl)-1,3-diphenyl-1H-pyrazole (3bb)

Yield:72% (red solid); mp 163–165°C;  $^1H$  NMR (400 MHz,  $DMSO-d_6$ )  $\delta$  9.02 (s, 1H), 8.22 (d,  $J = 8.8$  Hz, 2H), 7.97 (d,  $J = 7.7$  Hz, 2H), 7.65 – 7.48 (m, 6H), 7.48 – 7.41 (m, 3H), 7.38 (t,  $J = 7.4$  Hz, 1H).  $^{13}C$  NMR (151 MHz,  $DMSO-d_6$ )  $\delta$  150.46, 146.42, 140.07, 139.60, 132.91, 130.06, 129.59, 129.23, 129.10, 128.92, 128.81, 127.26, 124.29, 120.55, 119.00. HRMS (ESI-Q-TOF, m/z) calcd for  $C_{21}H_{15}N_3O_2$   $[M + H]^+$ : 342.2166, found  $[M + H]^+$ :342.3728.

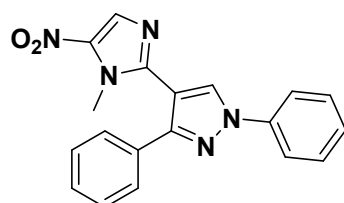

**3bc, 64%**

#### 4-(1-methyl-5-nitro-1H-imidazol-2-yl)-1,3-diphenyl-1H-pyrazole (3bc)

Yield:64% (yellow solid); mp 177–179°C;  $^1H$  NMR (400 MHz,  $DMSO-d_6$ )  $\delta$  9.04 (s, 1H), 8.25 (s, 1H), 8.00 (d,  $J = 7.9$  Hz, 2H), 7.64 – 7.52 (m, 4H), 7.46 – 7.36 (m, 4H), 3.72 (s, 3H).  $^{13}C$  NMR (101 MHz,  $DMSO-d_6$ )  $\delta$  151.58, 145.83, 140.04, 139.43, 133.33, 132.21, 132.05, 130.14, 129.11, 127.72, 119.35, 109.72, 35.05. HRMS (ESI-Q-TOF, m/z) calcd for  $C_{19}H_{15}N_5O_2$   $[M + H]^+$ : 346.2131, found  $[M + H]^+$ :346.4620.



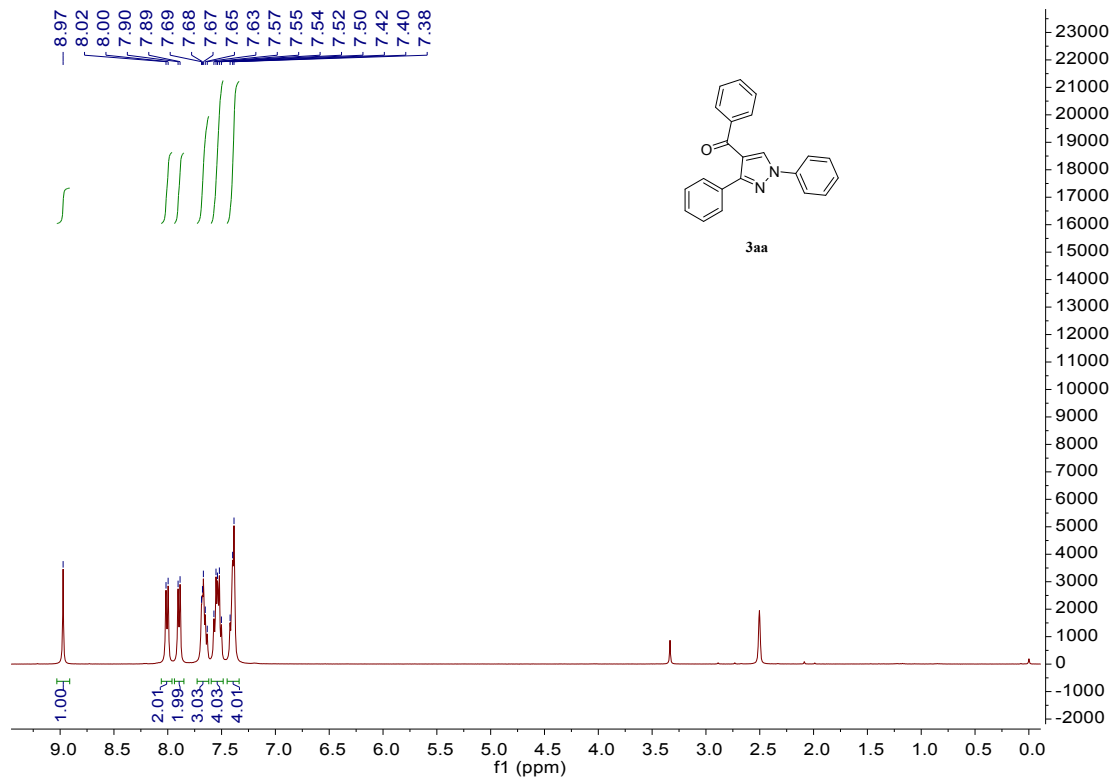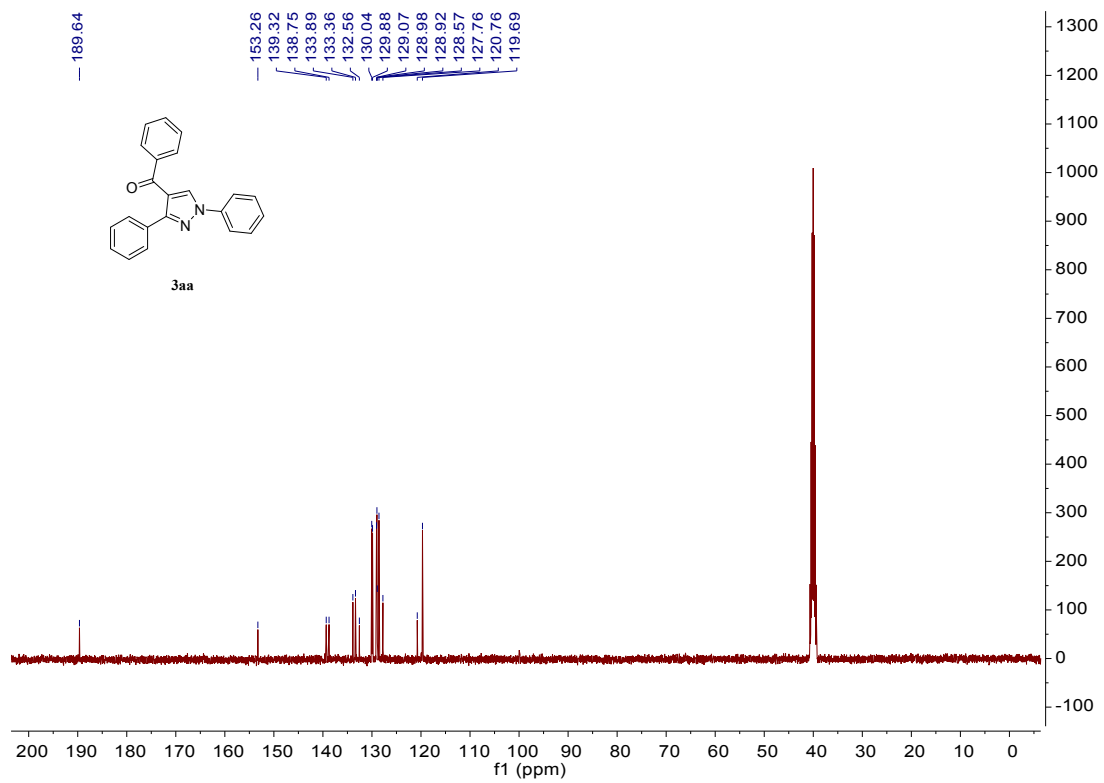

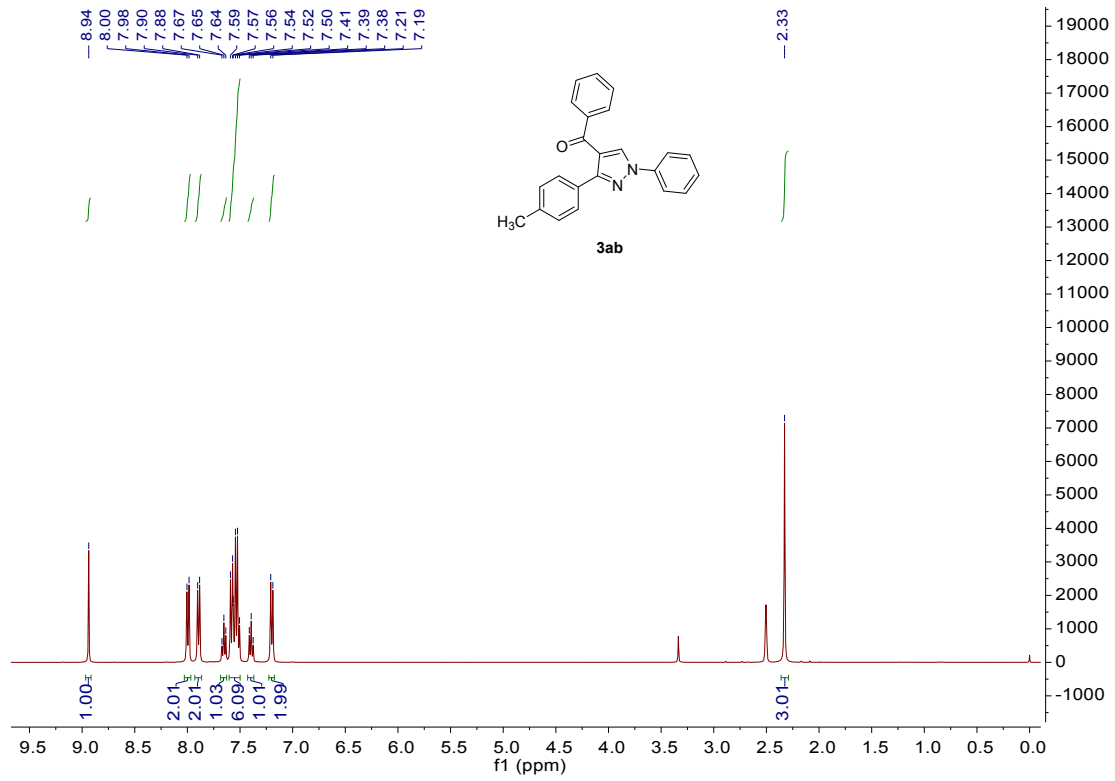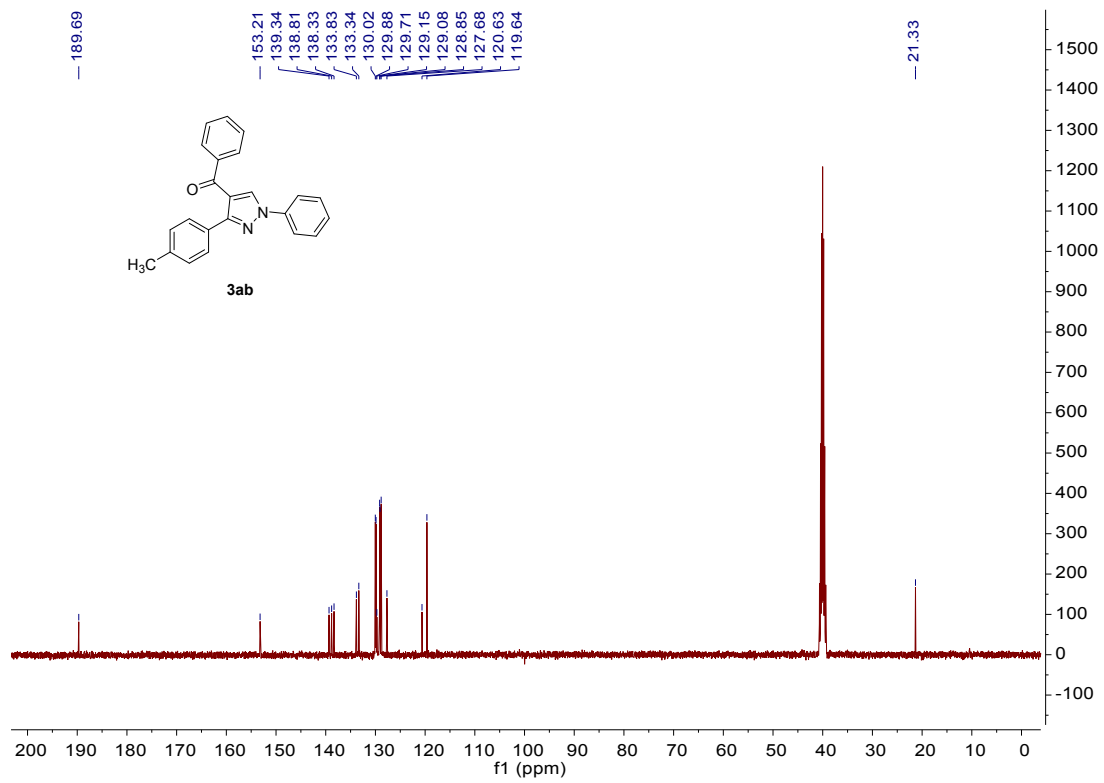

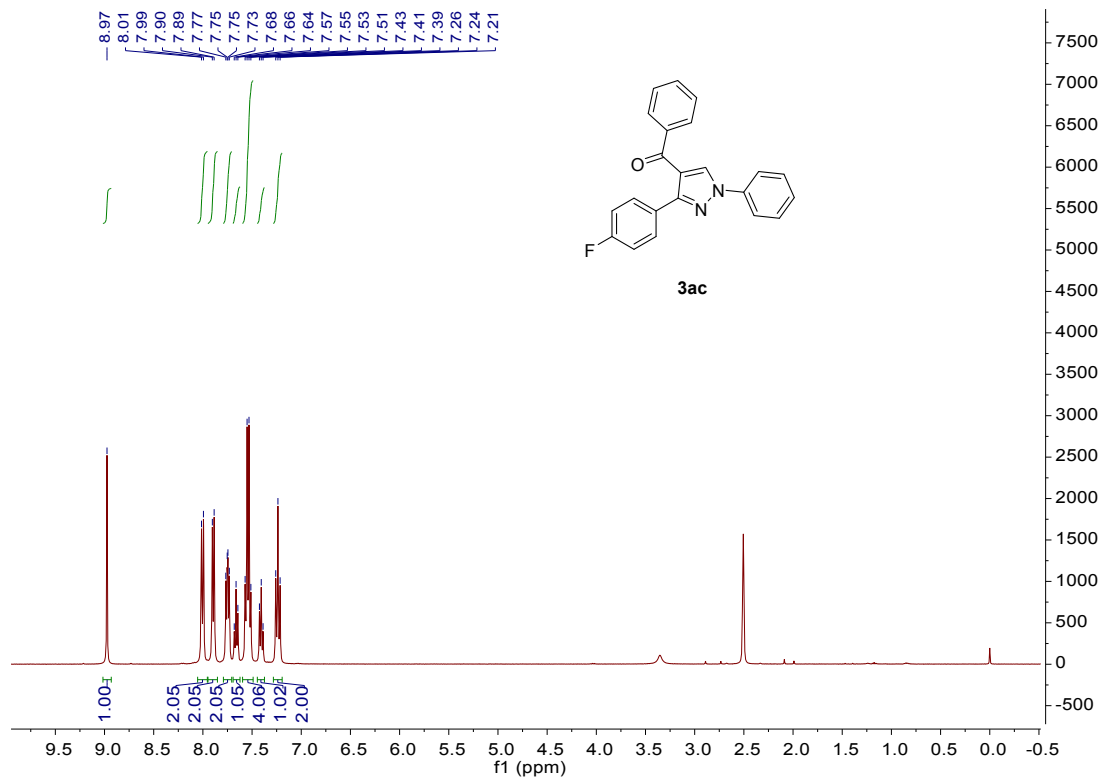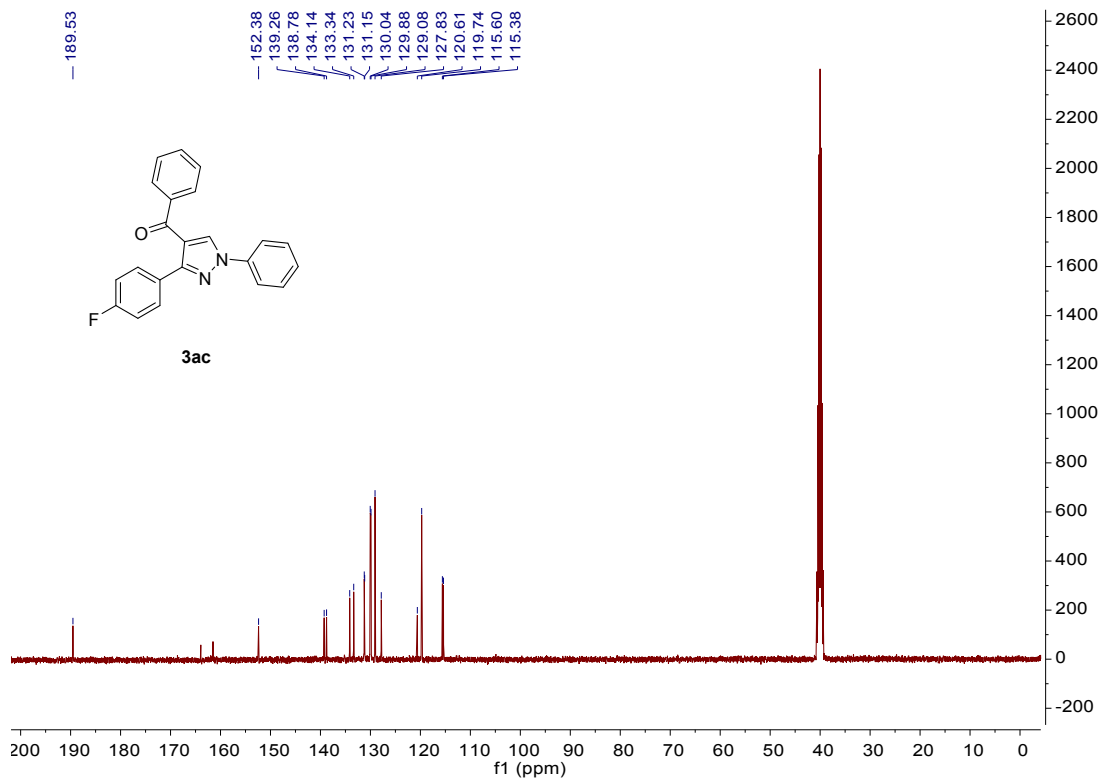

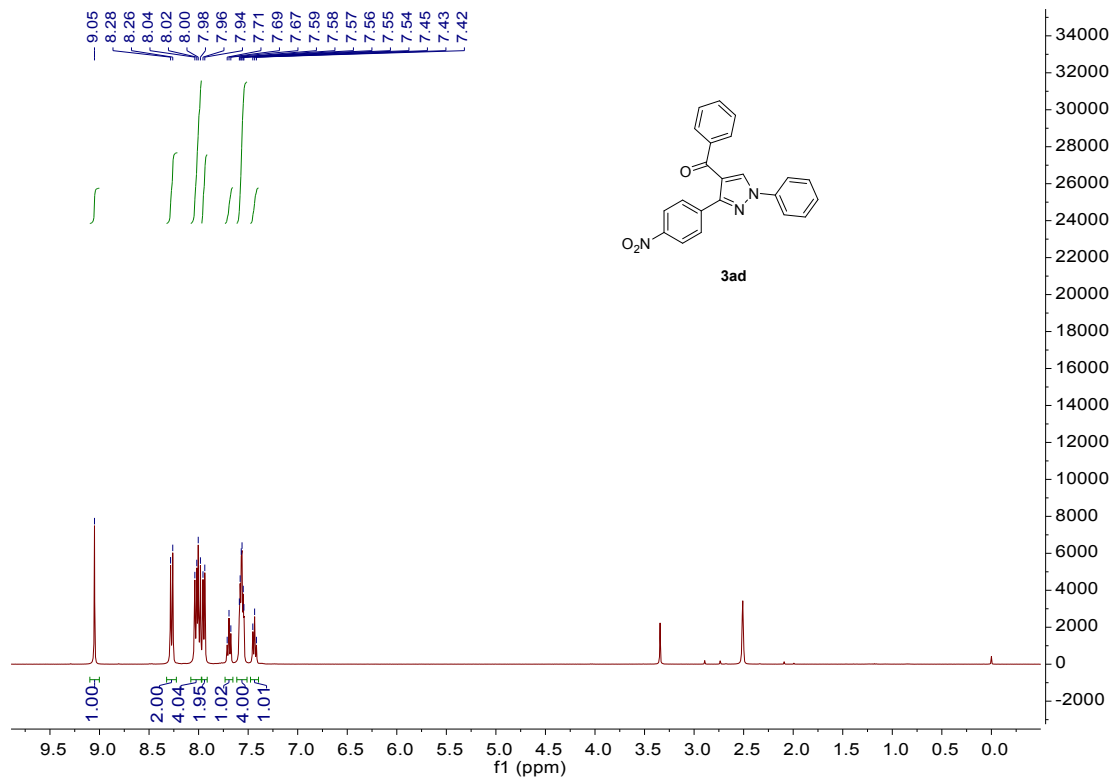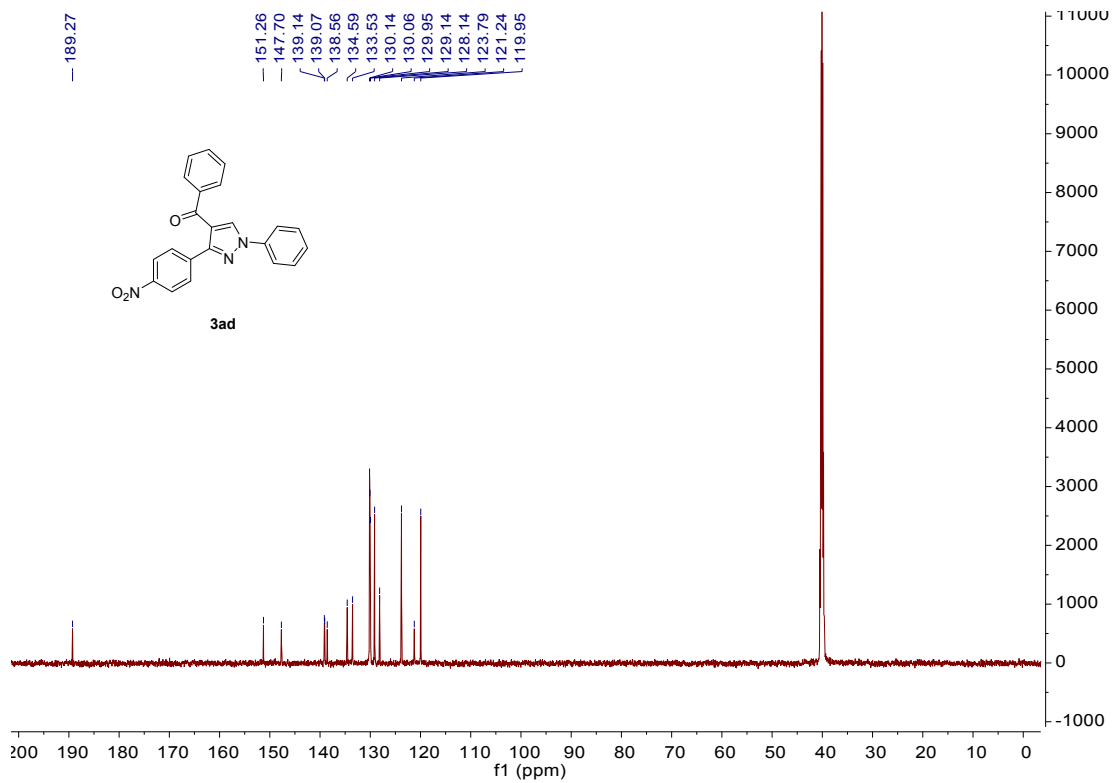

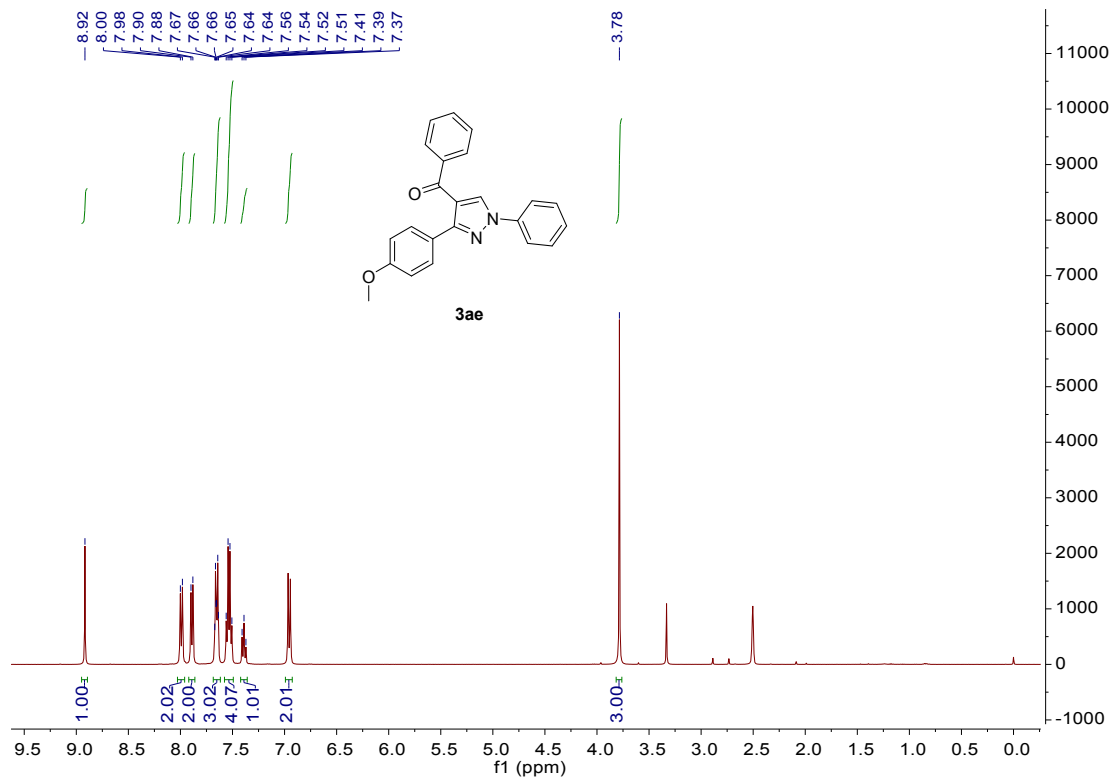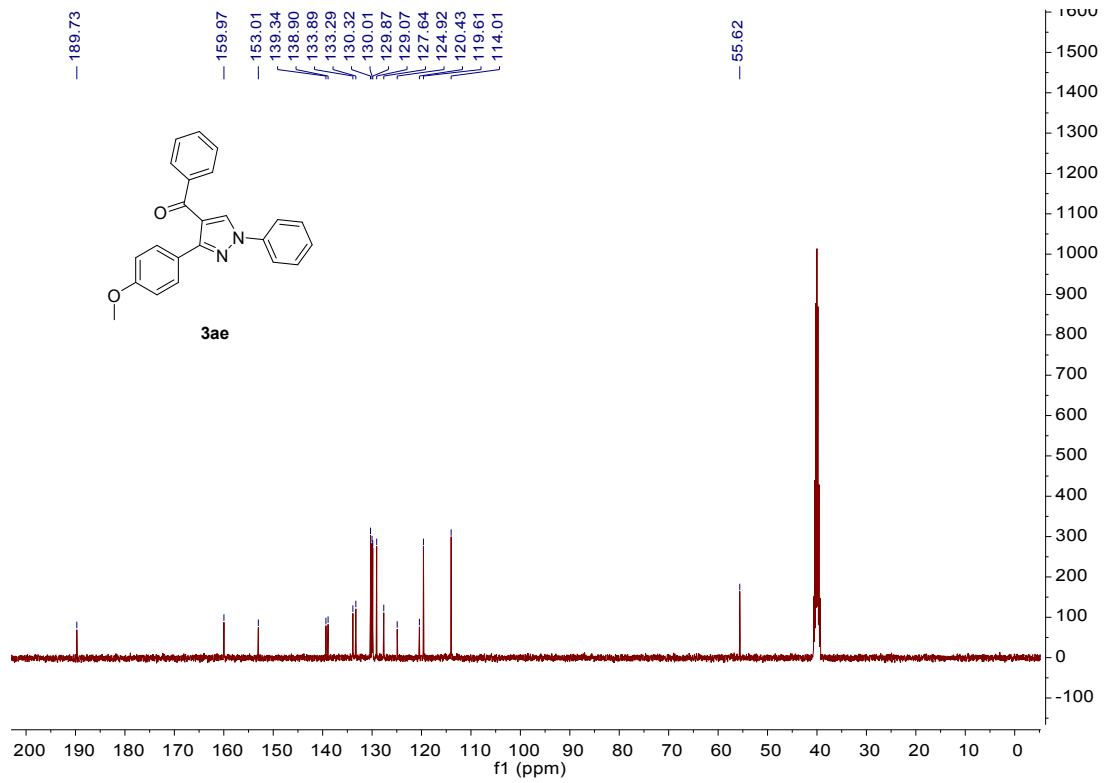

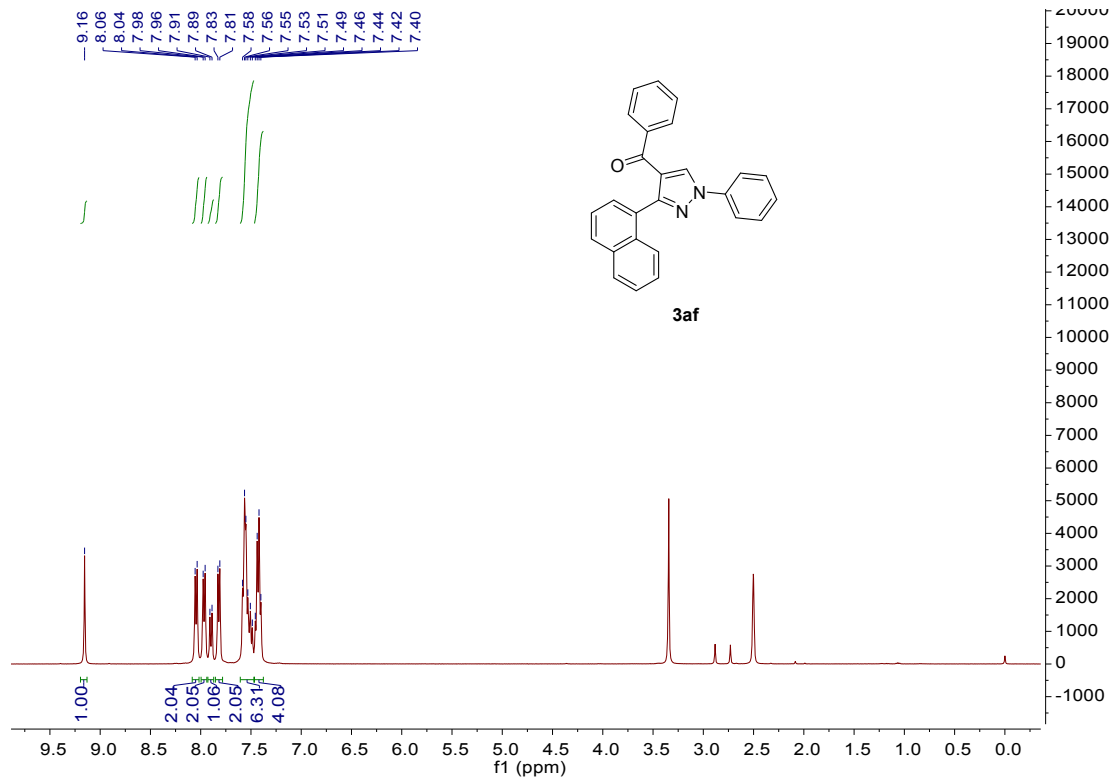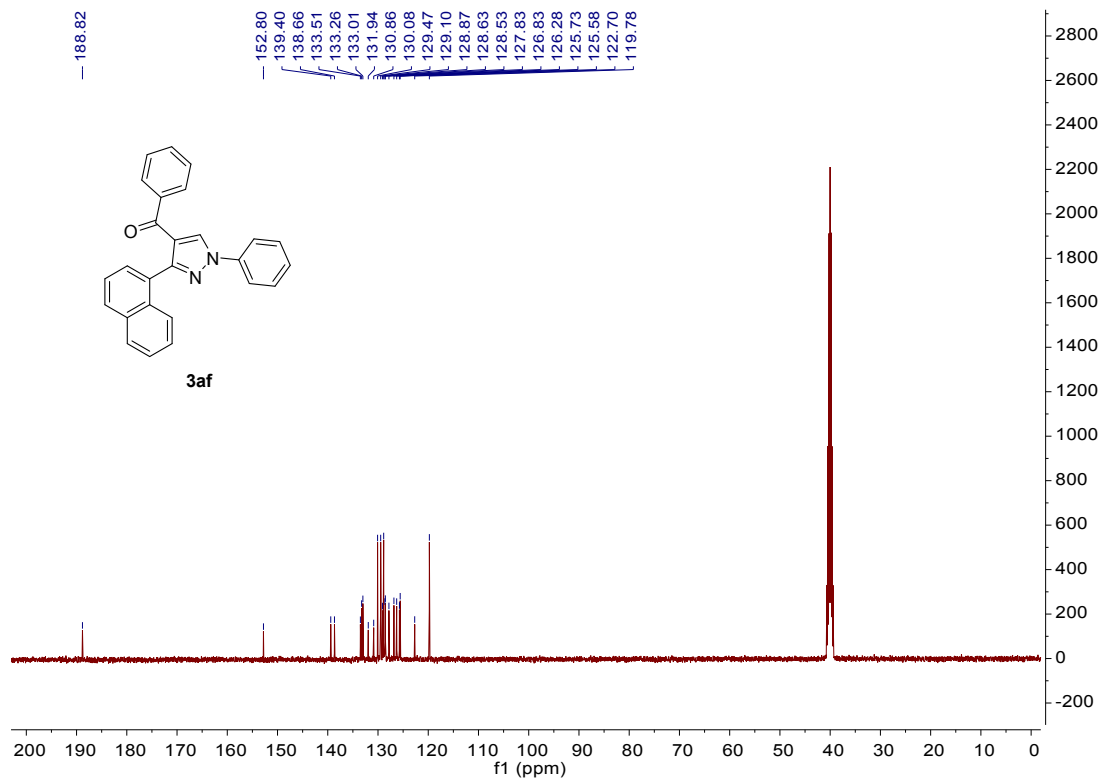

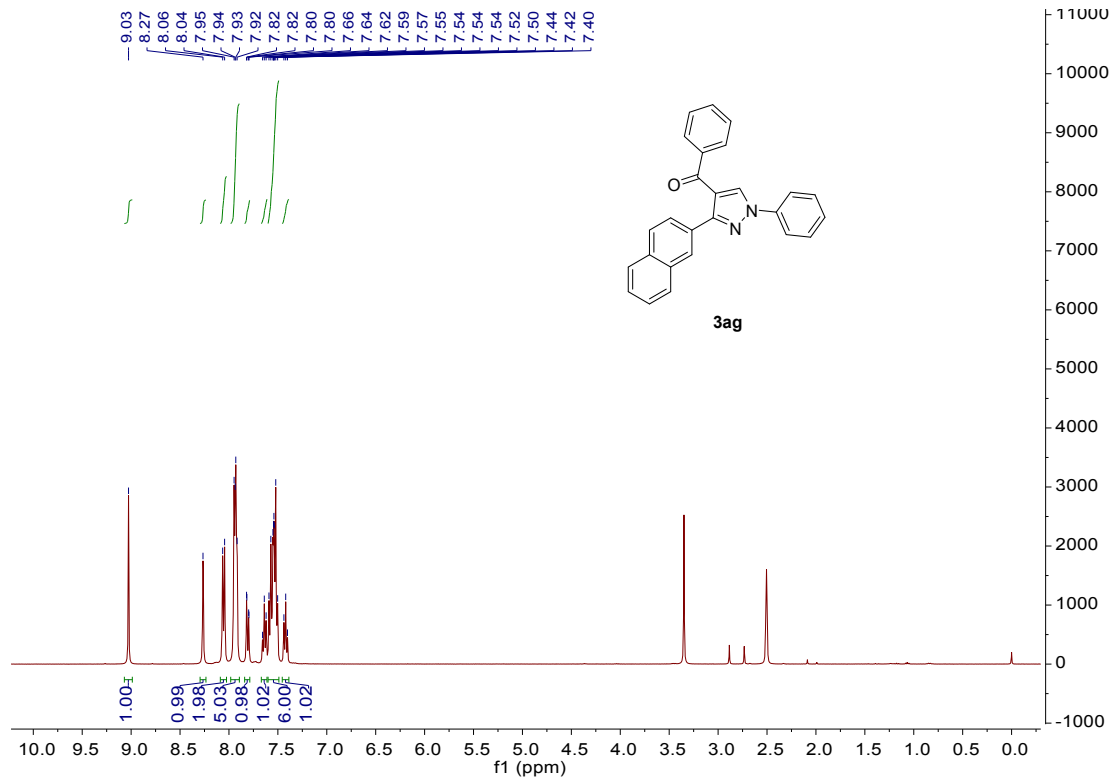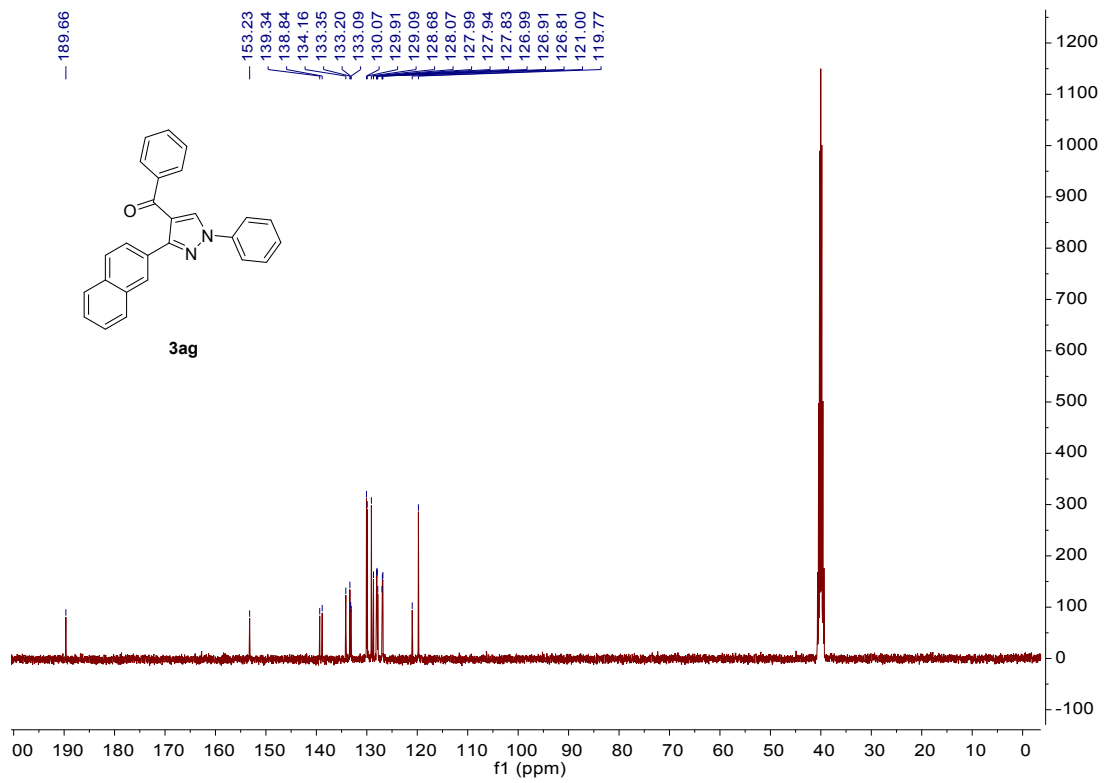

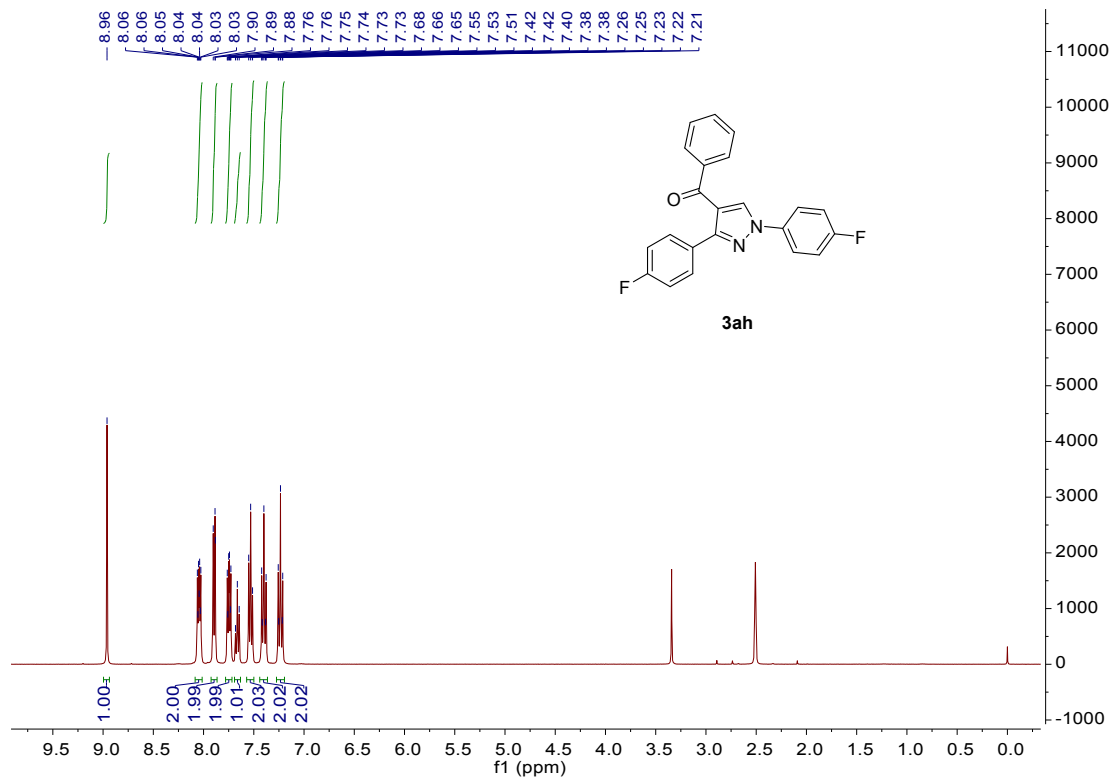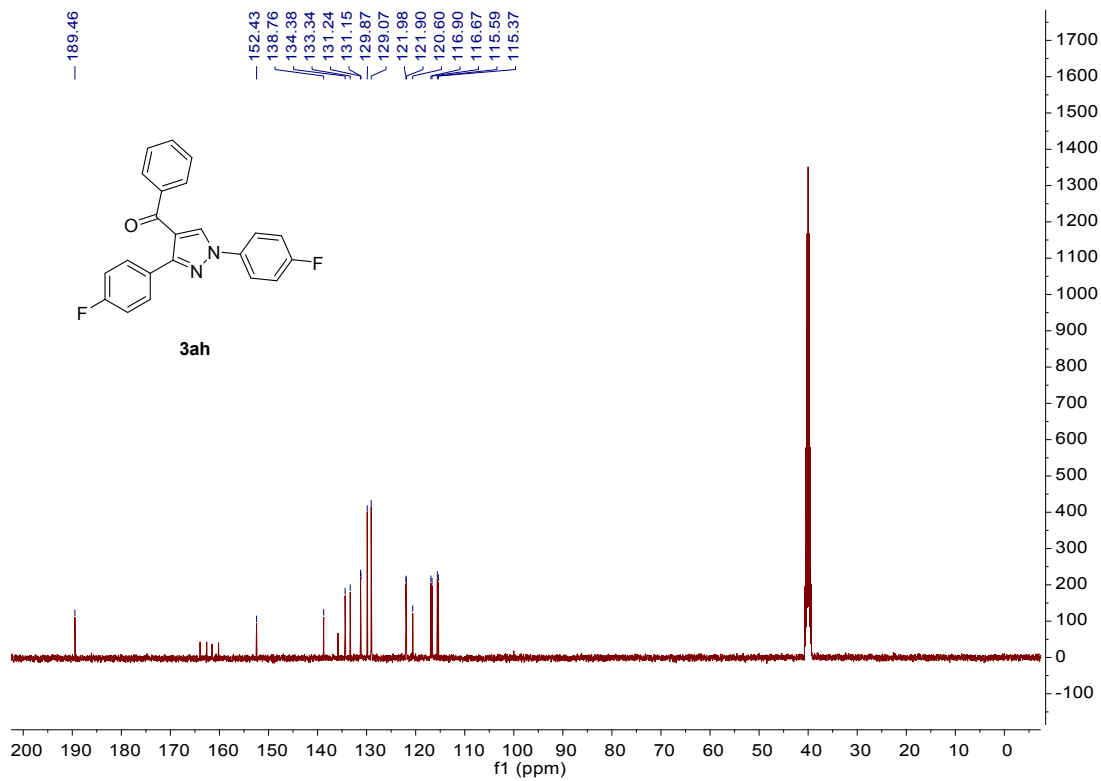



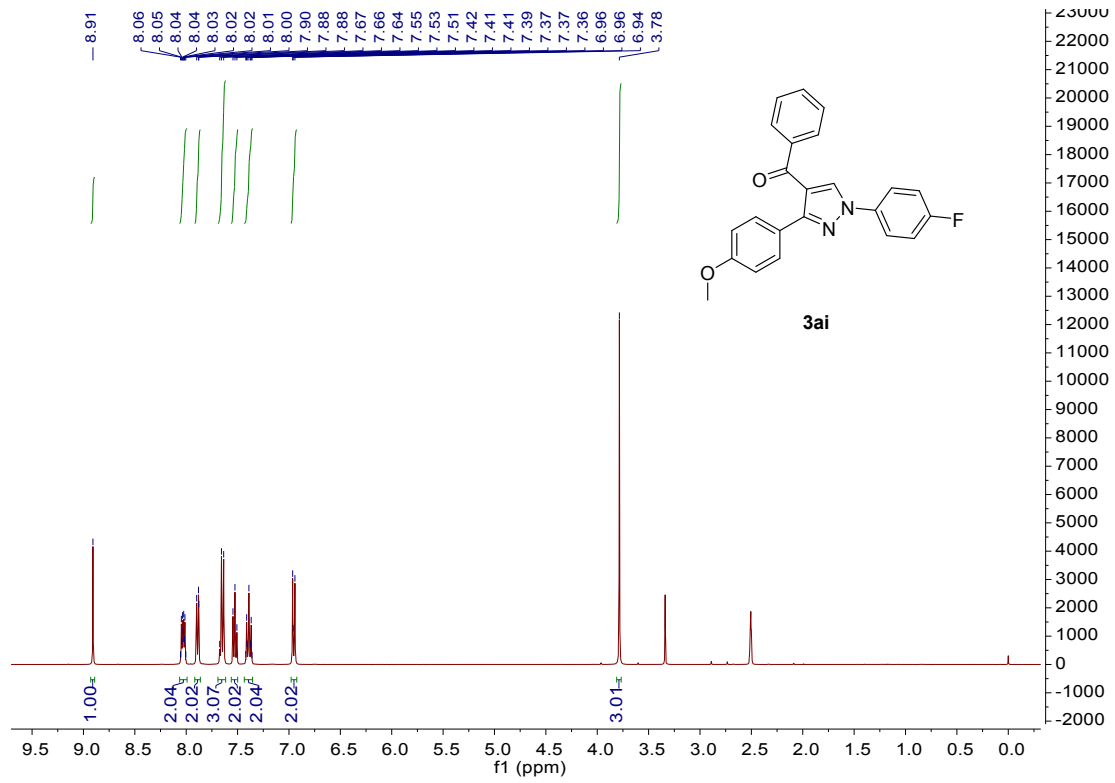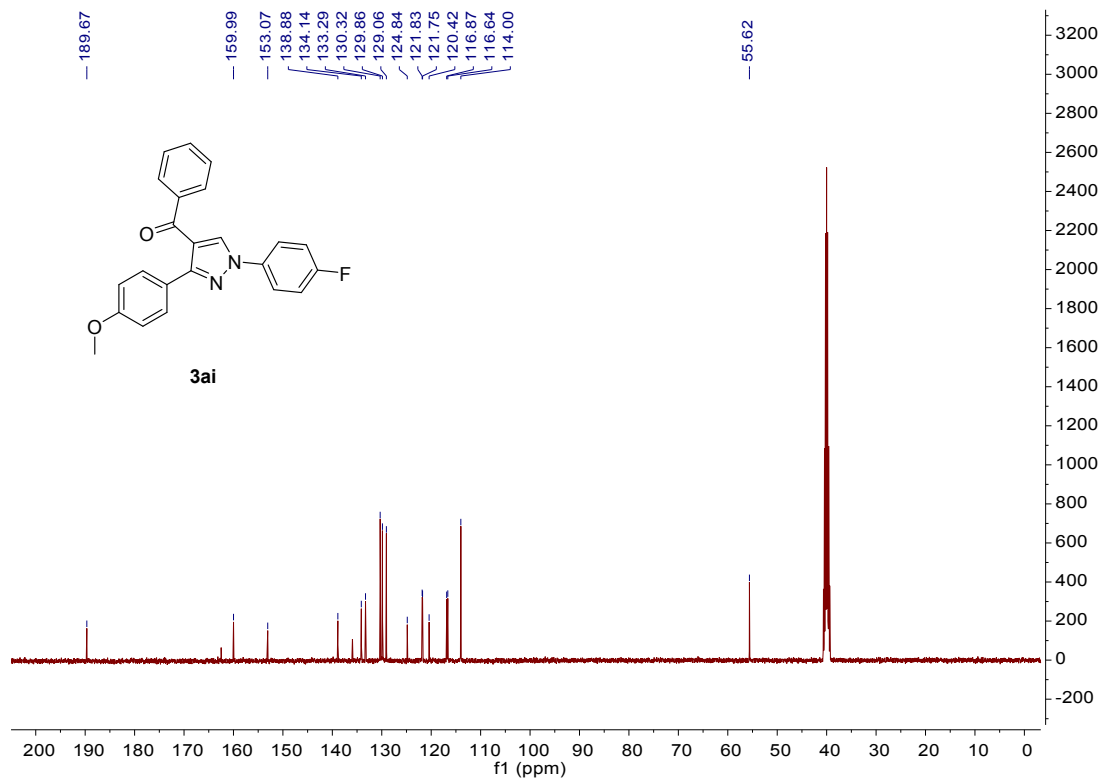

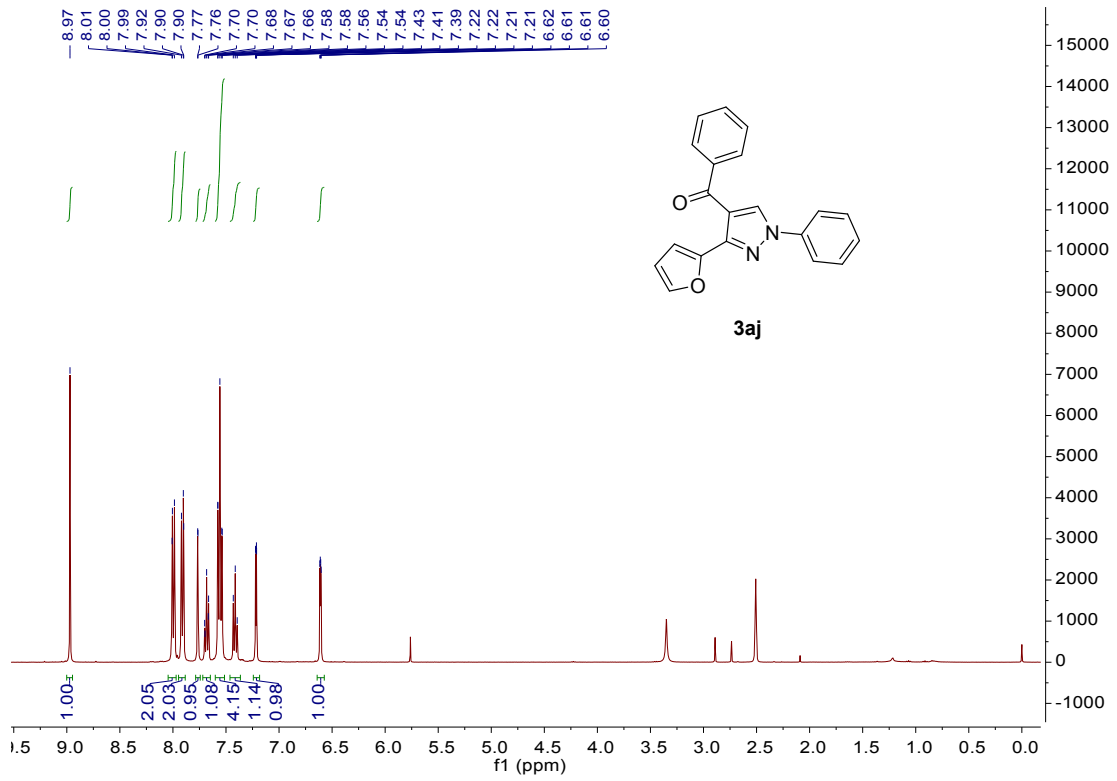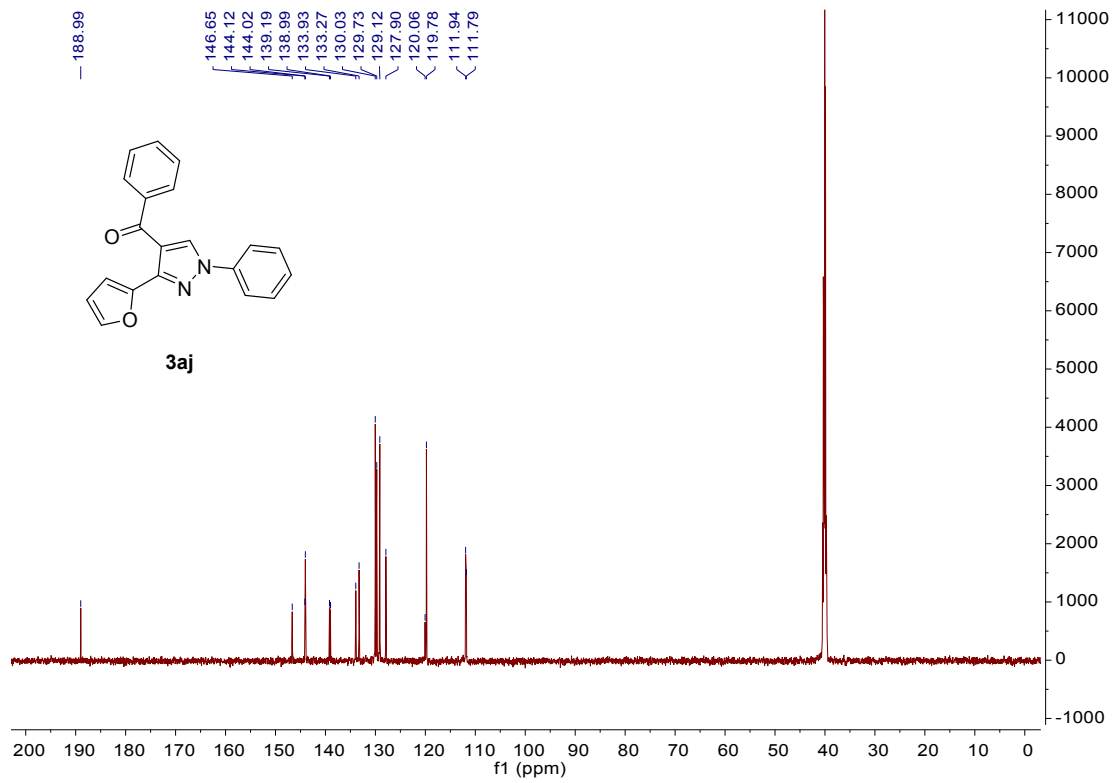

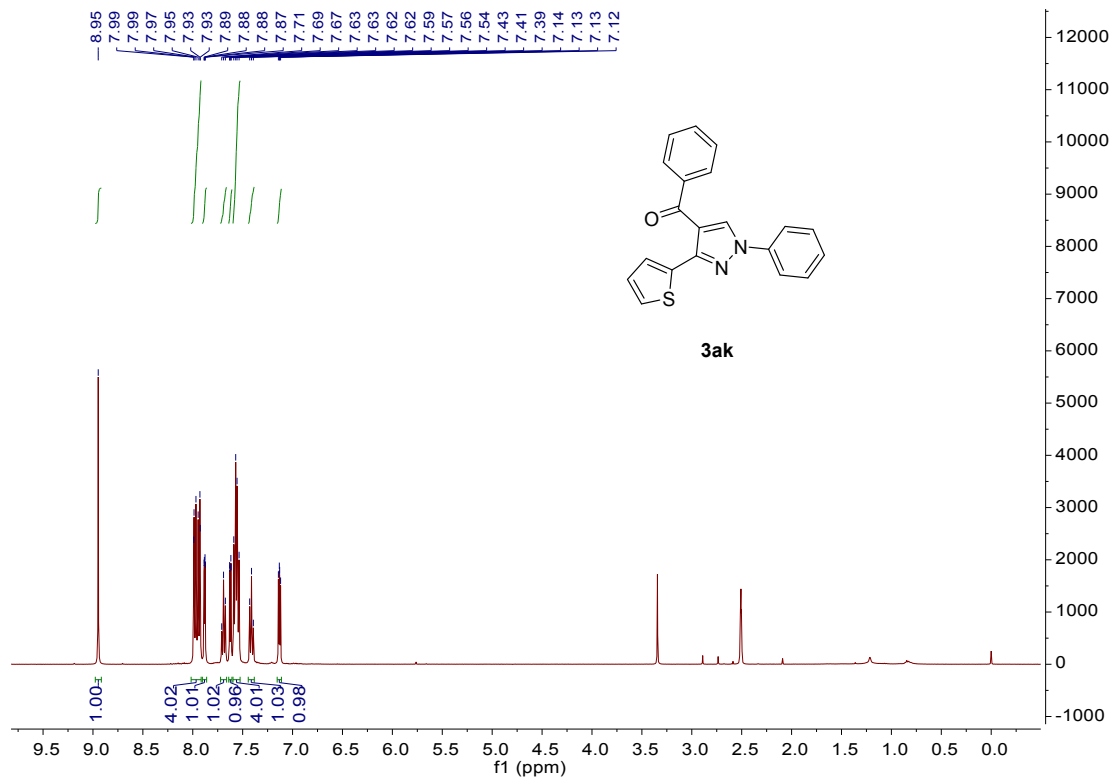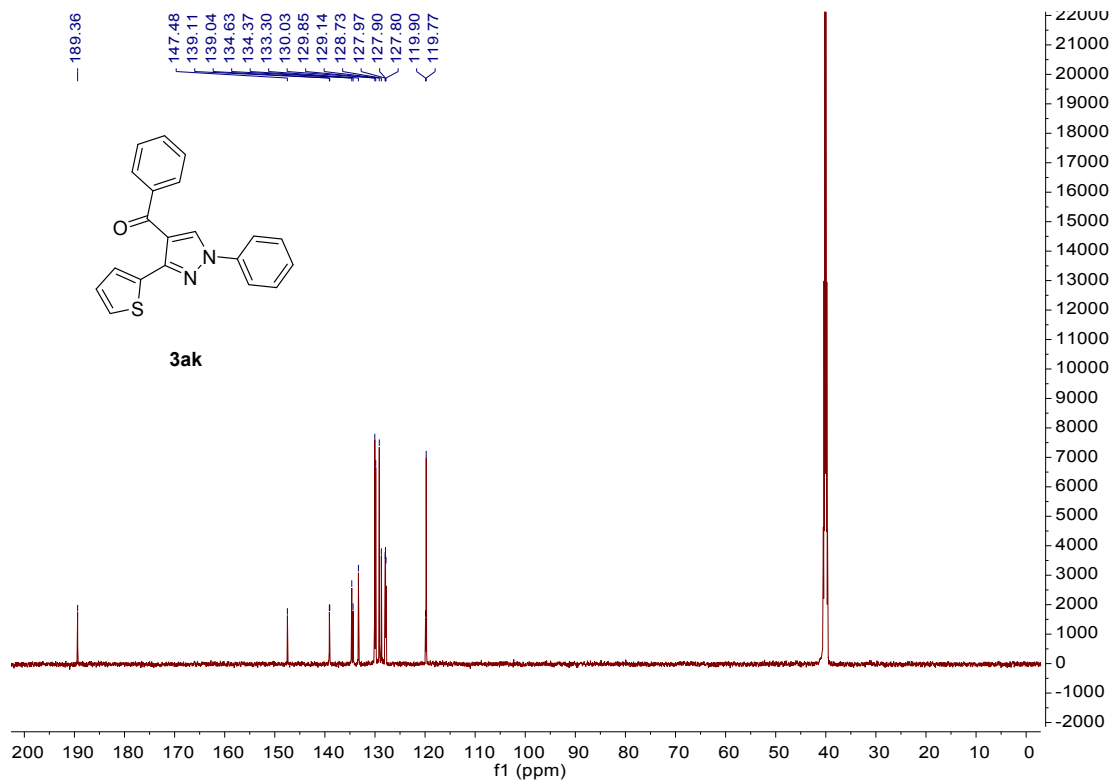

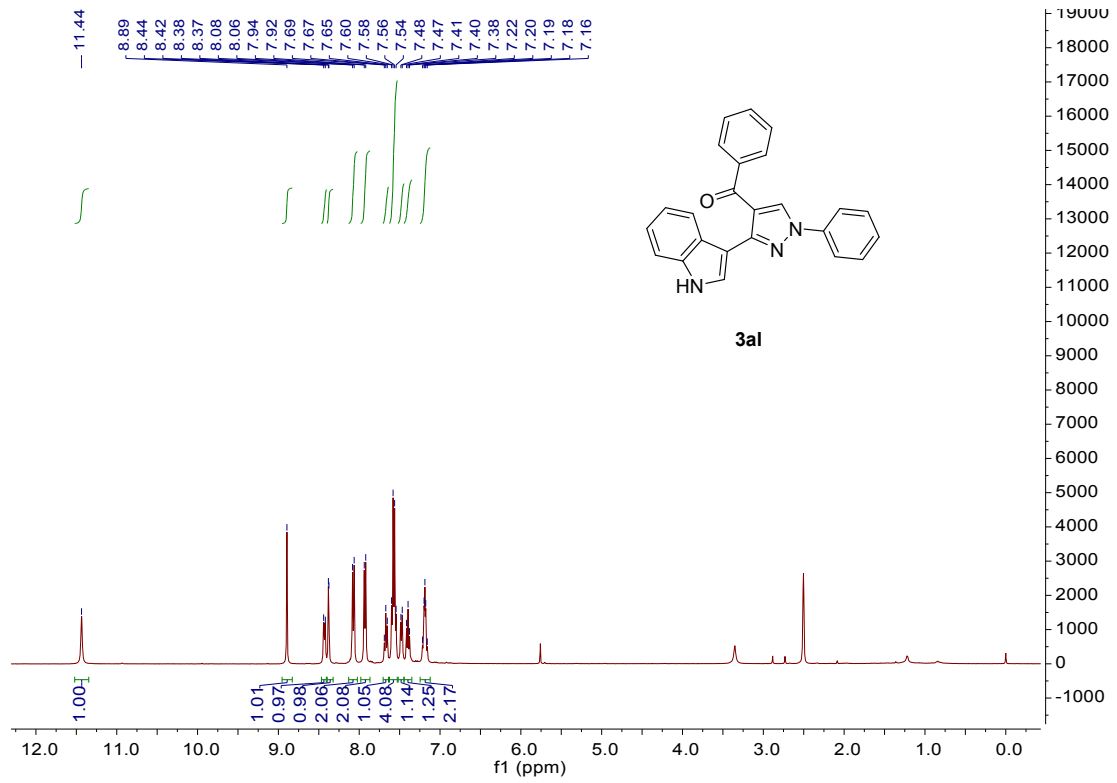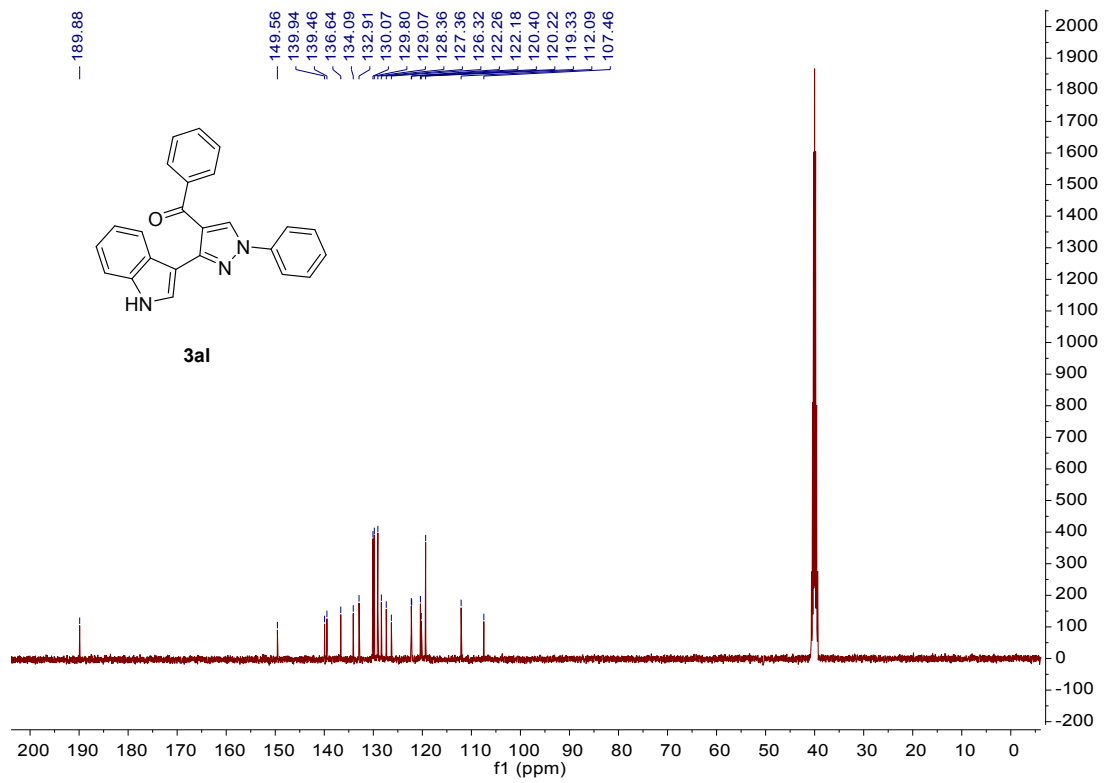

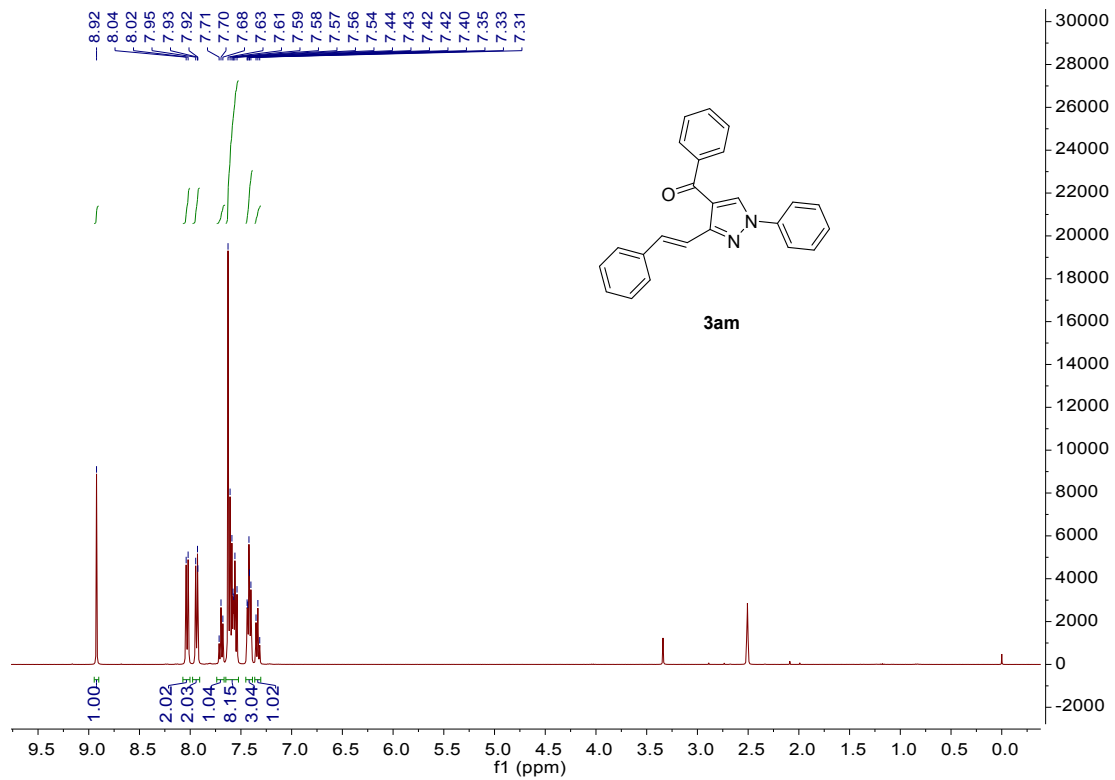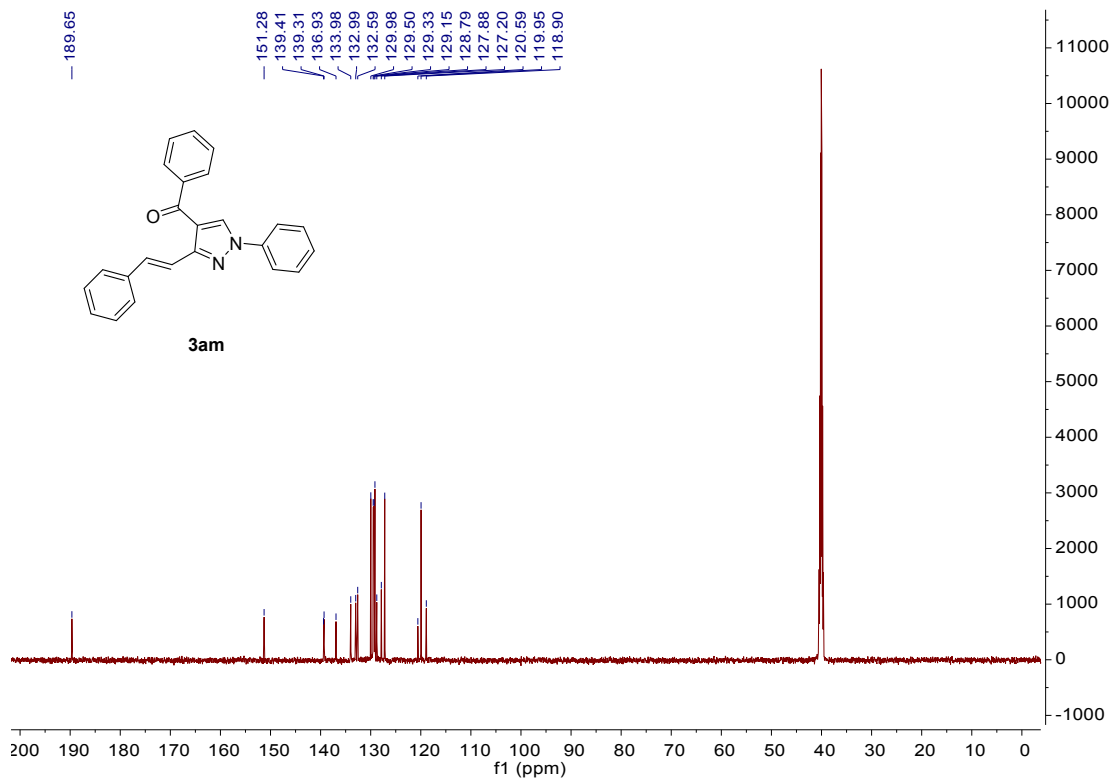

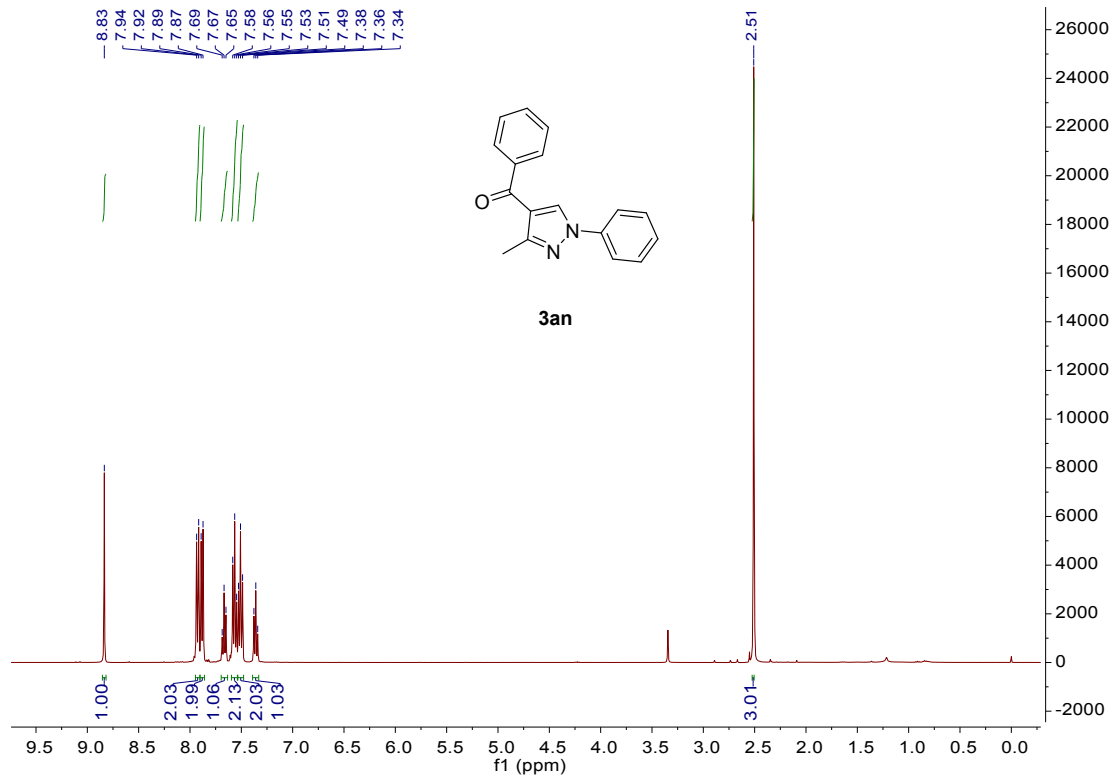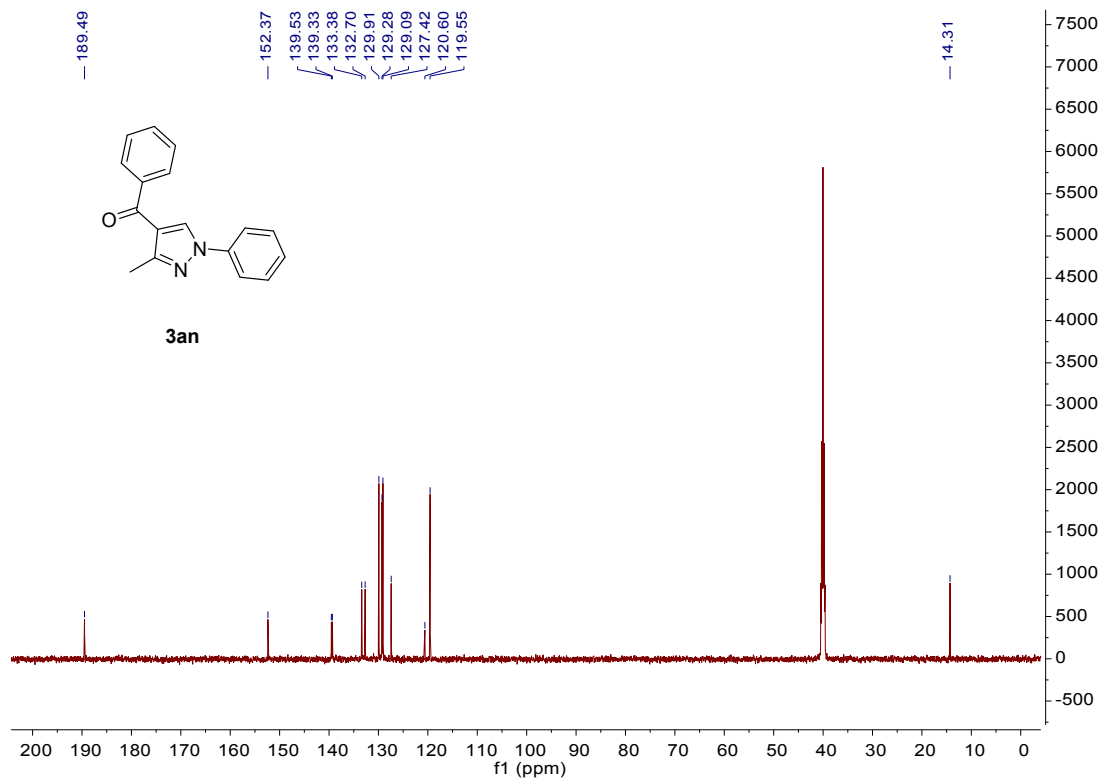

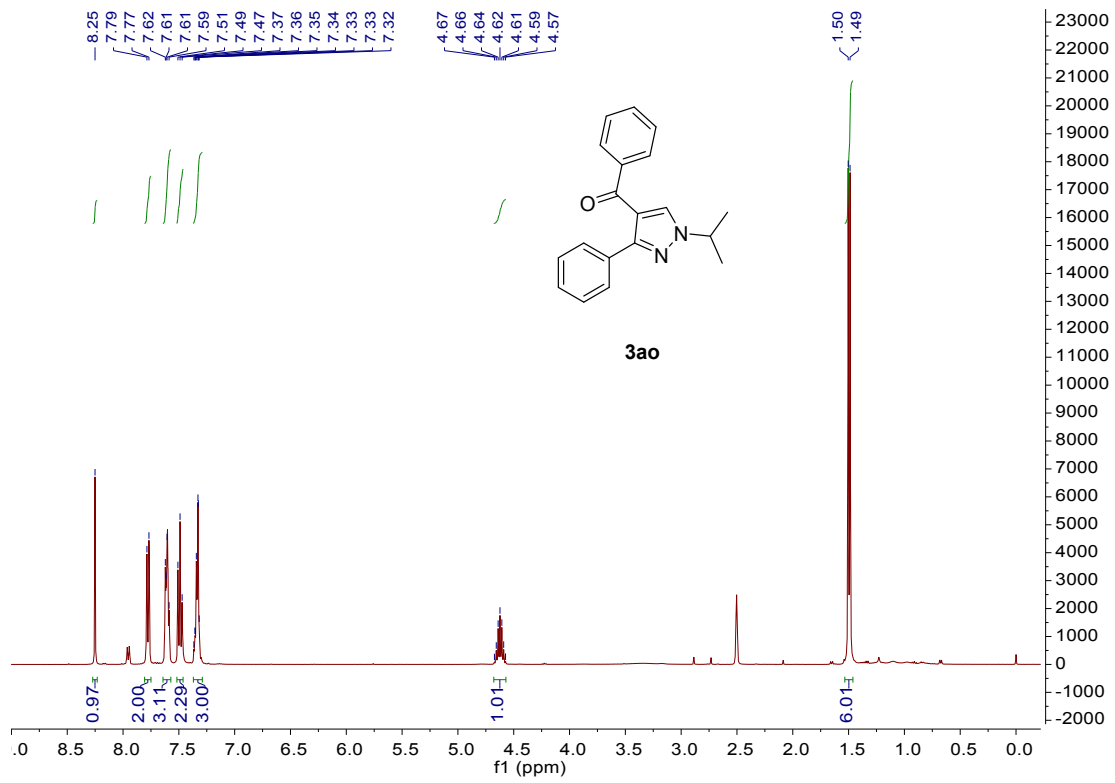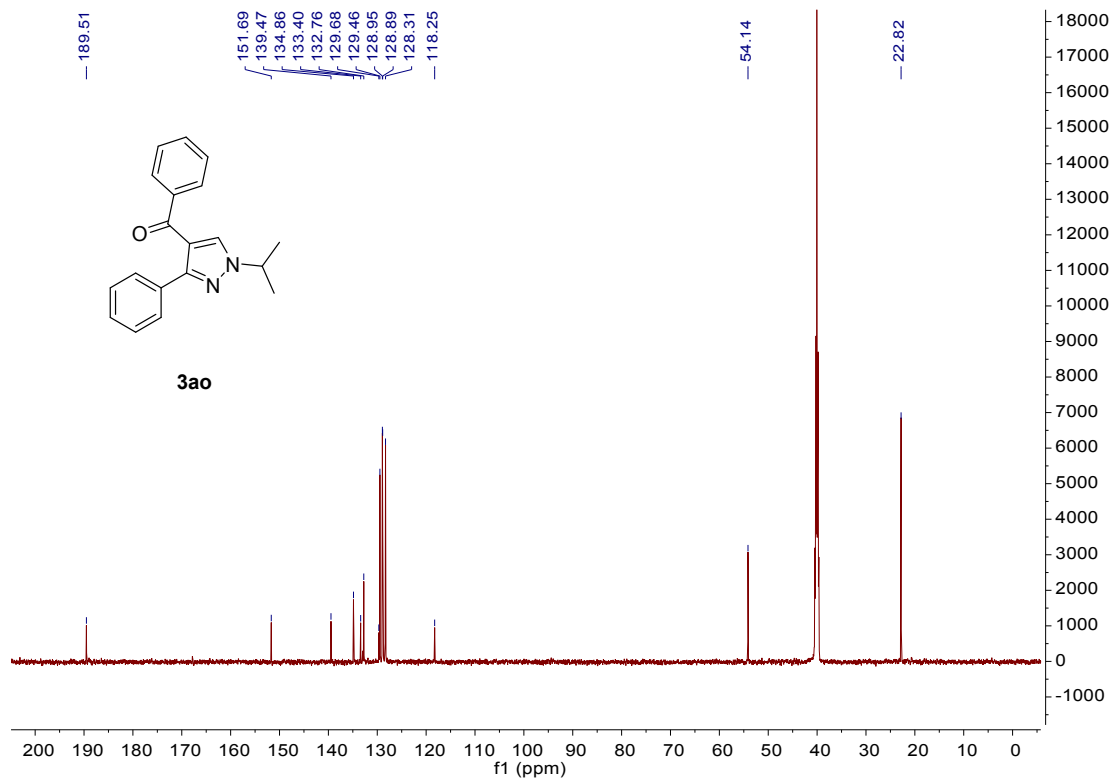

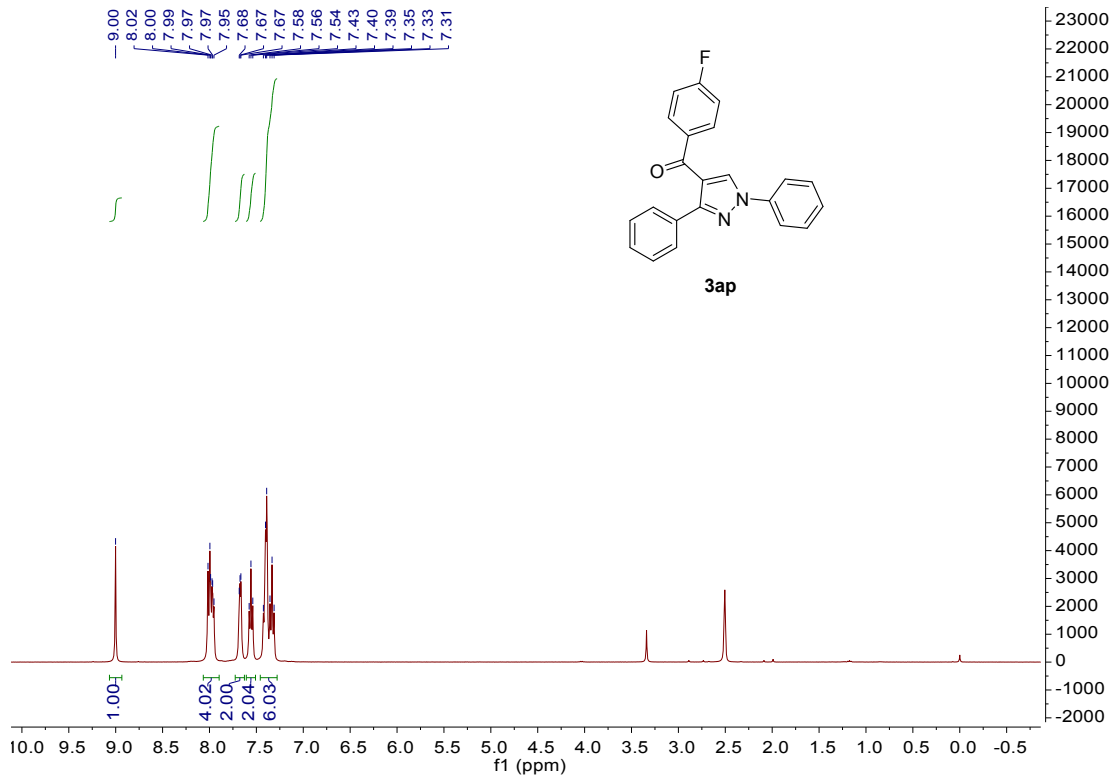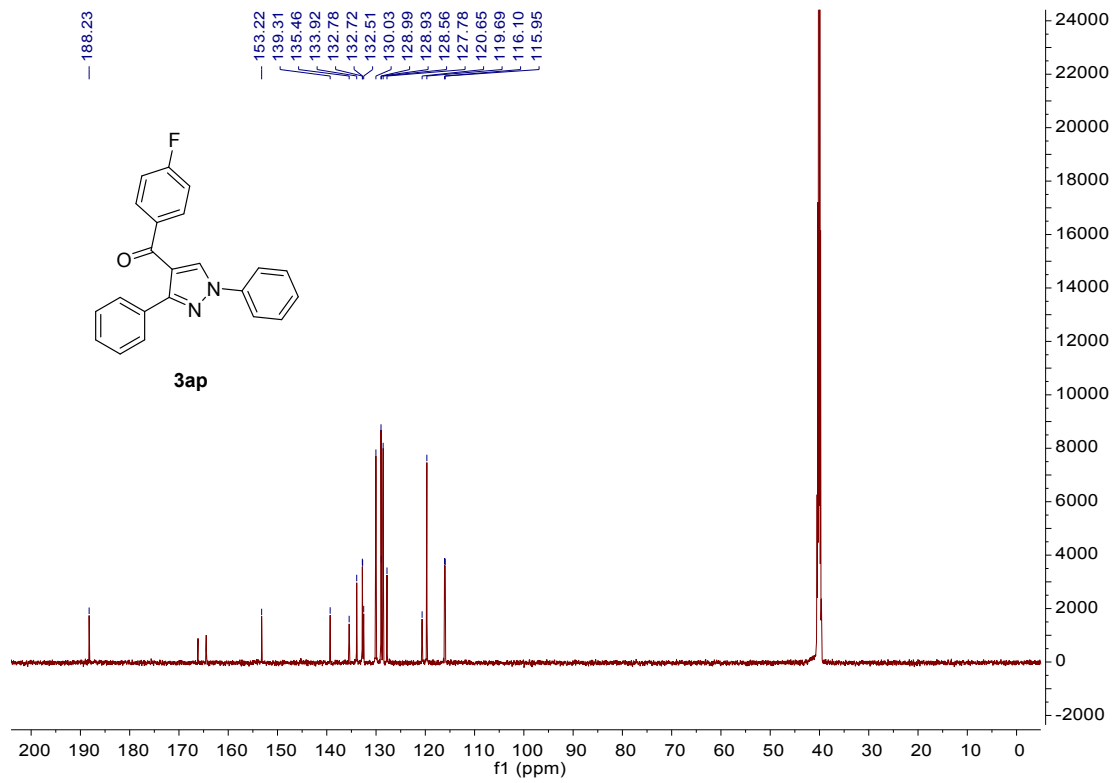



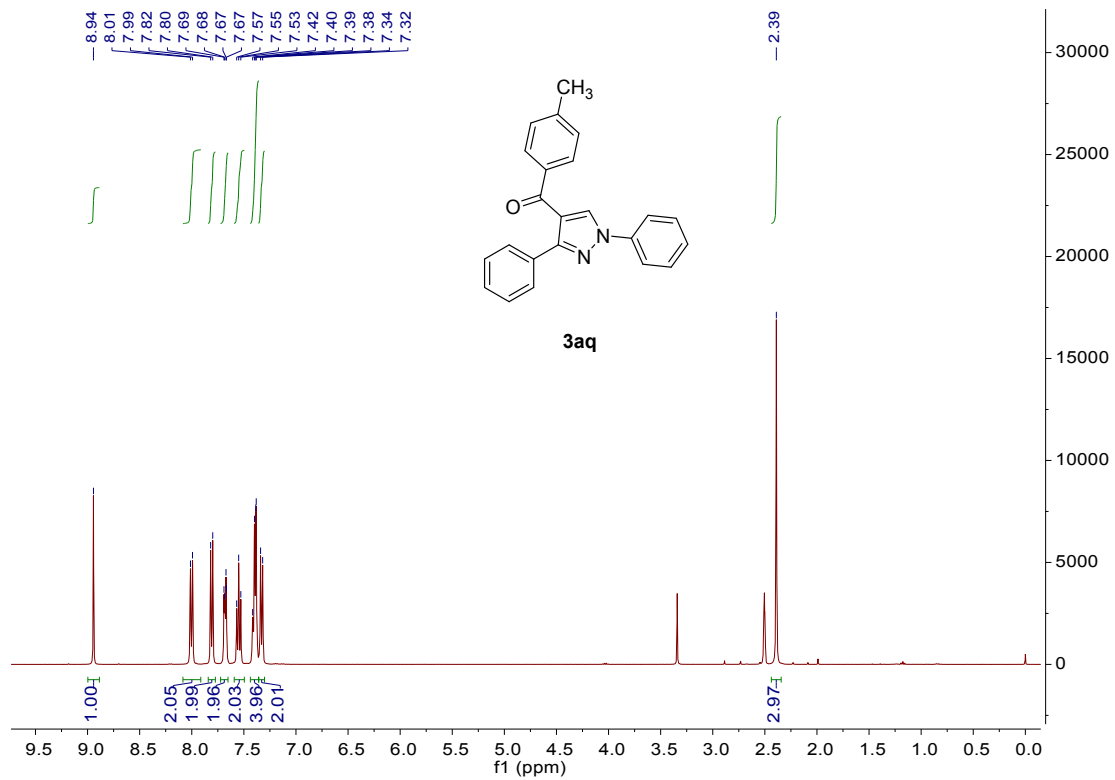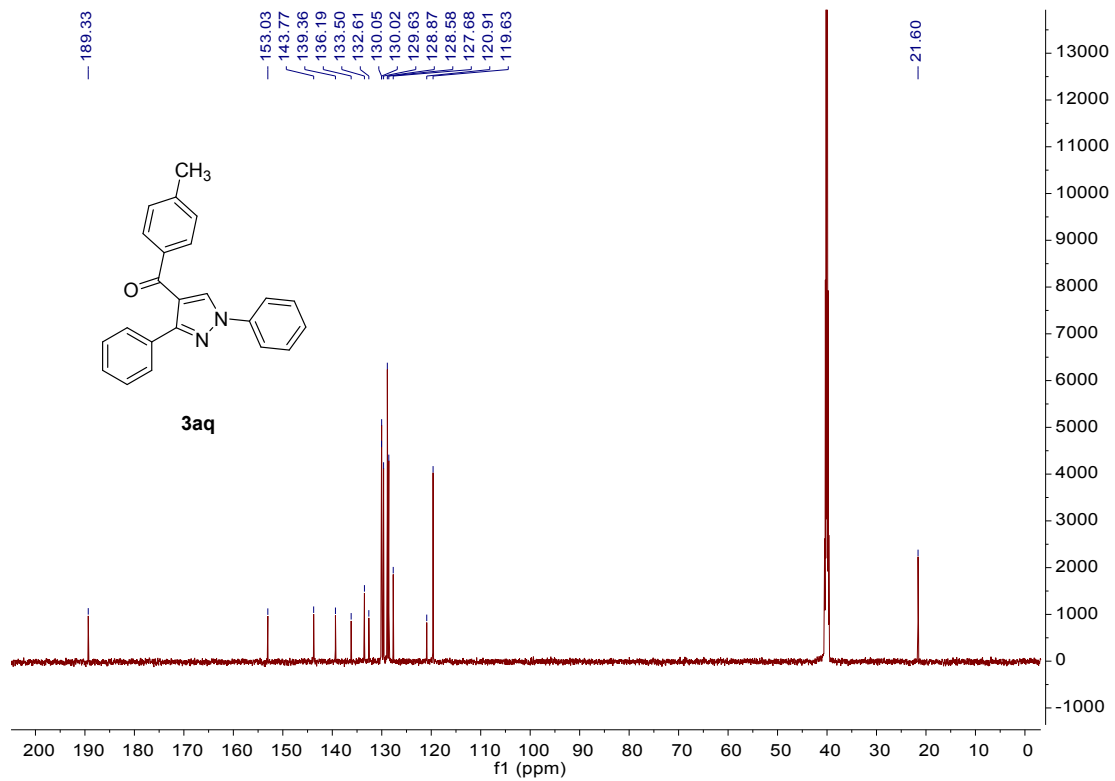

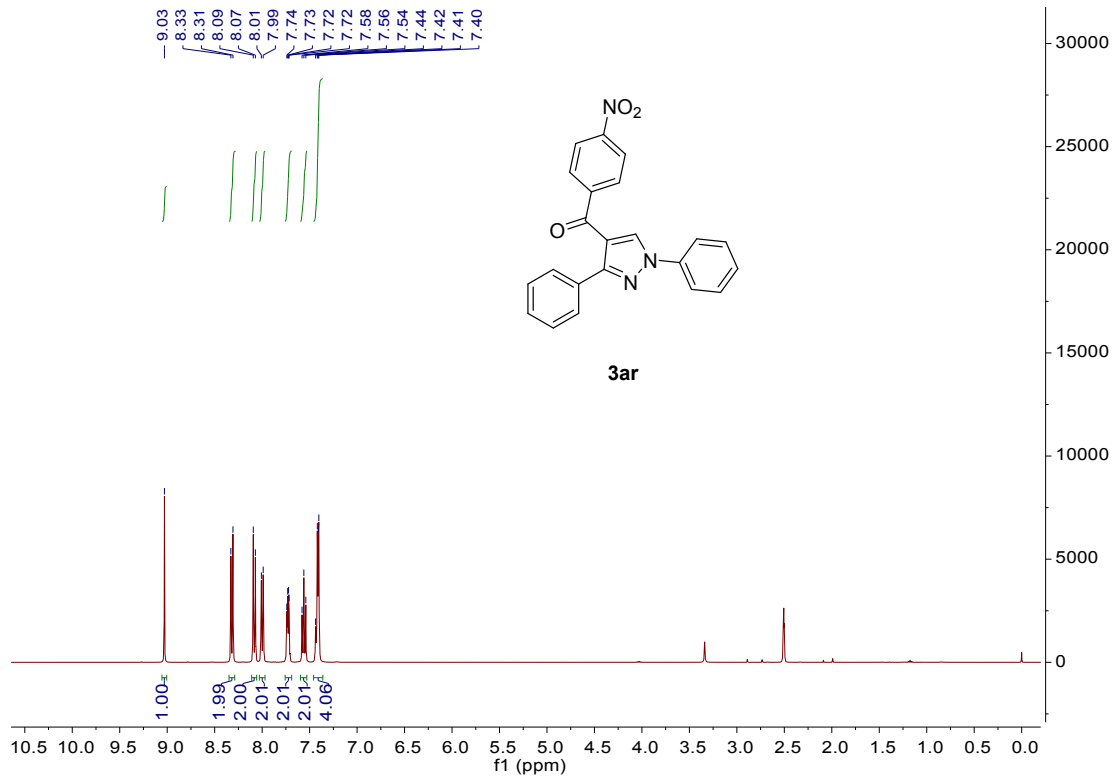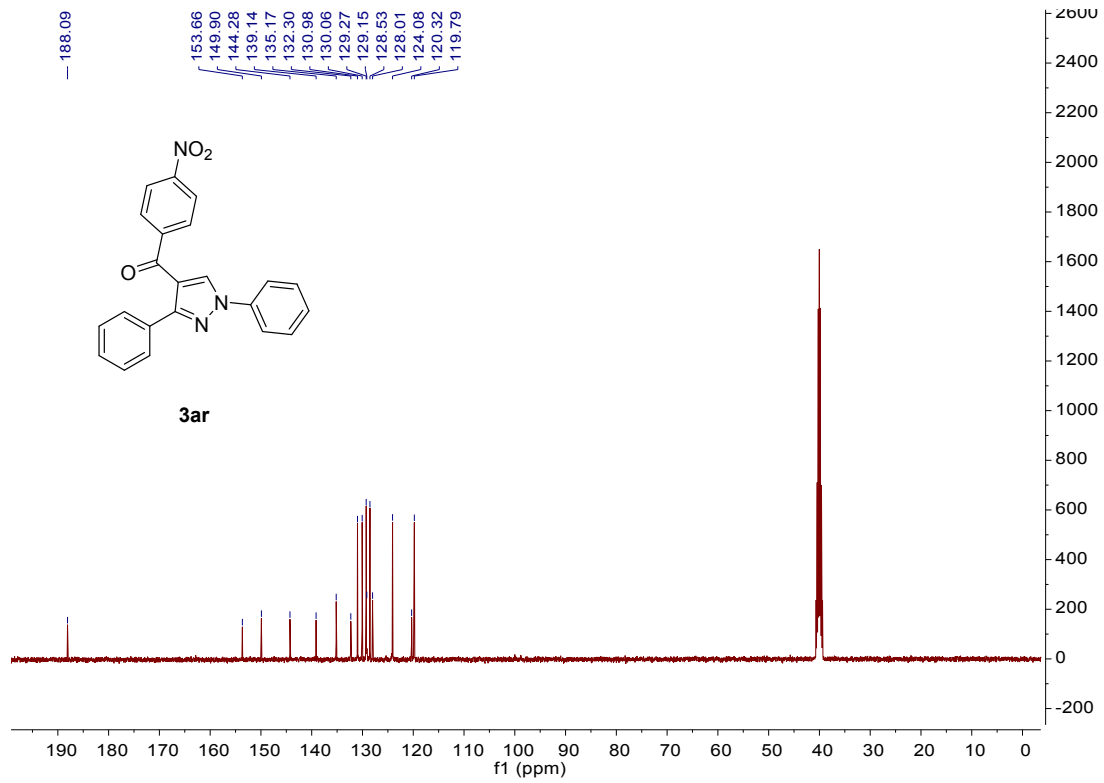

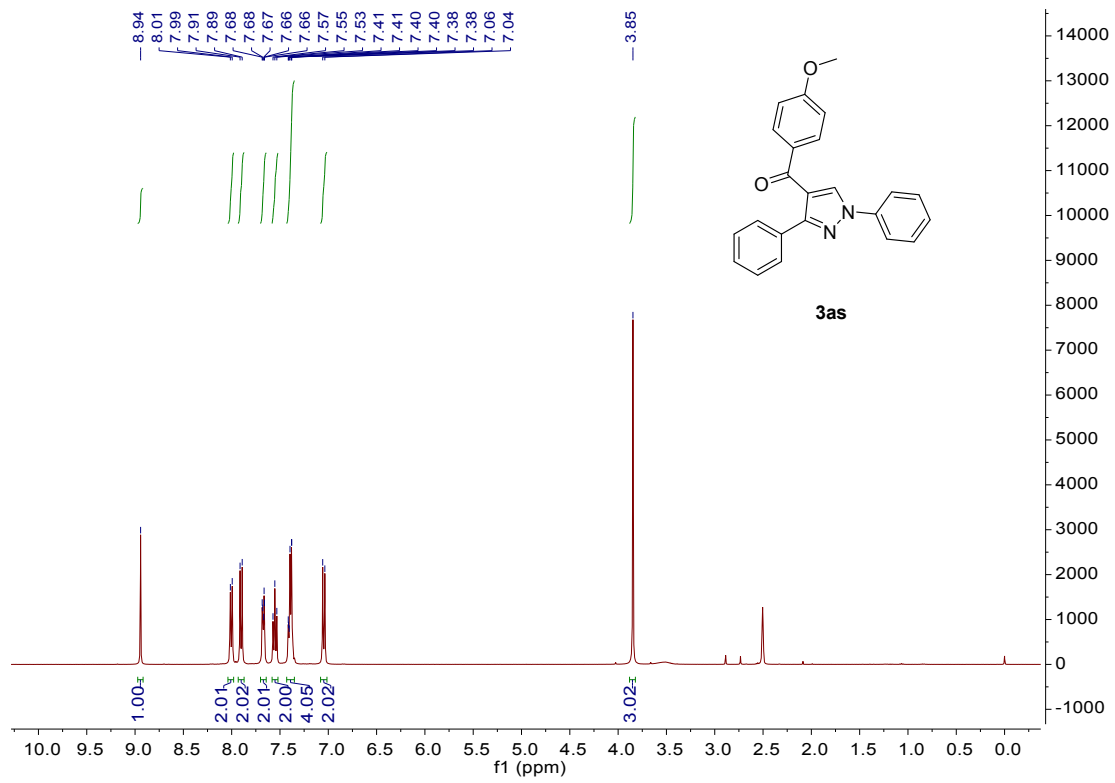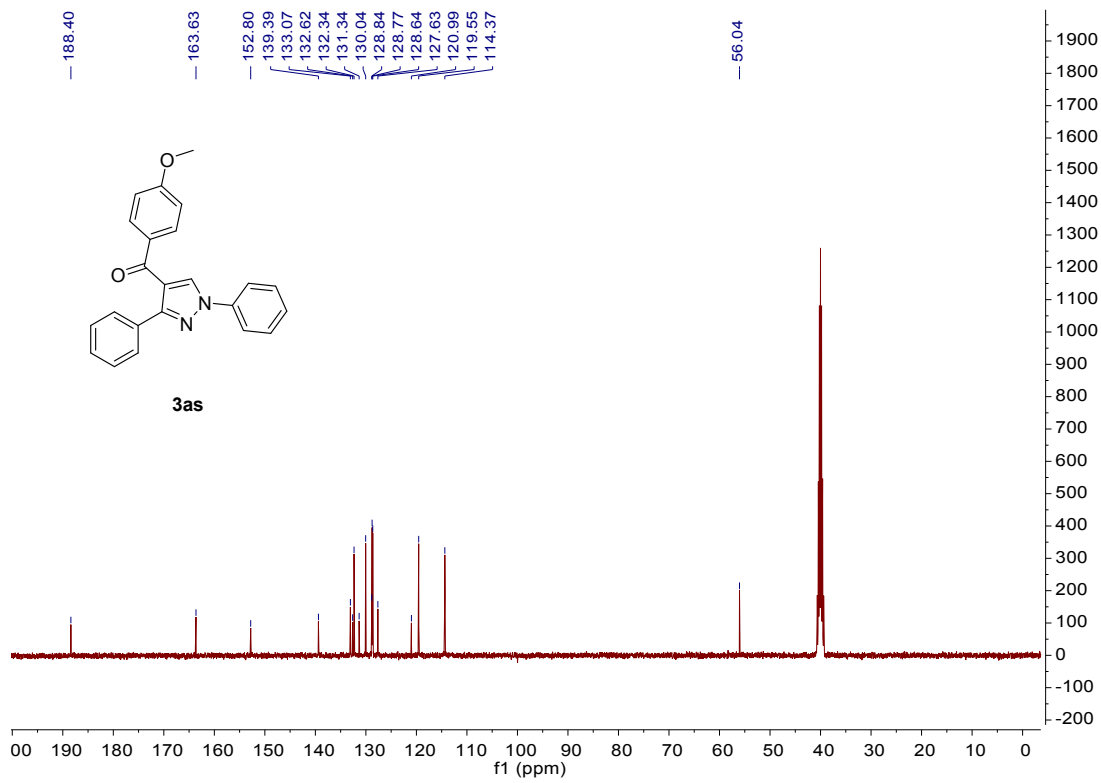

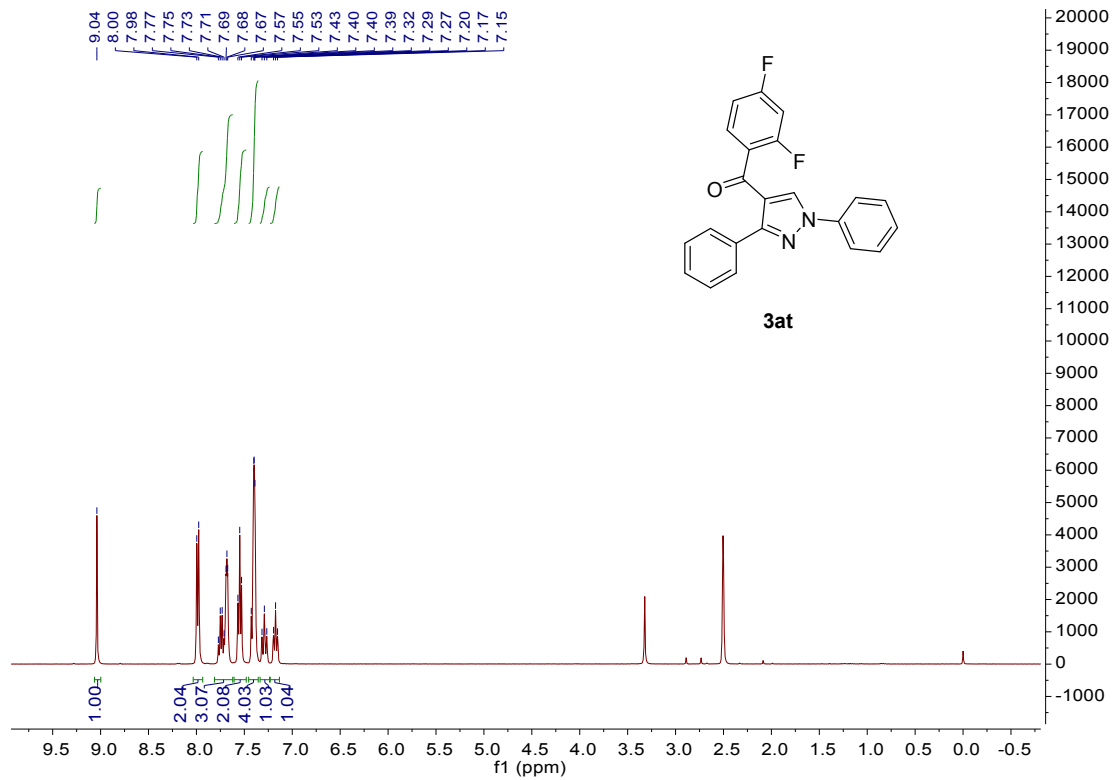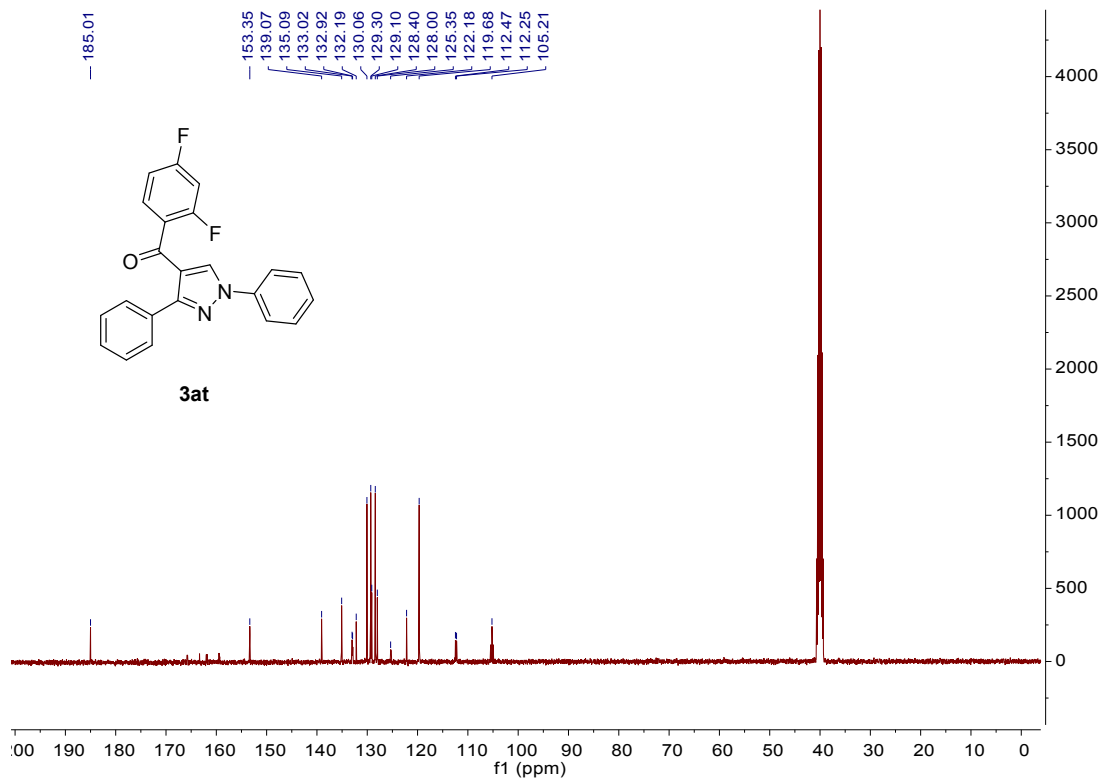

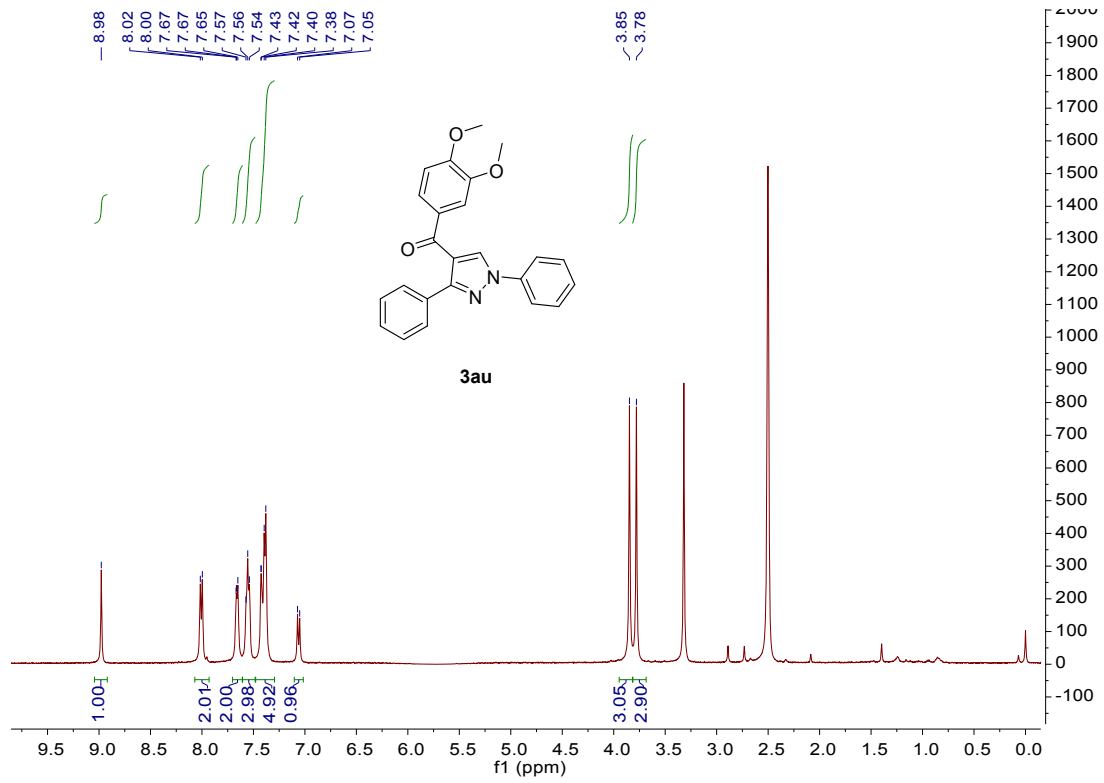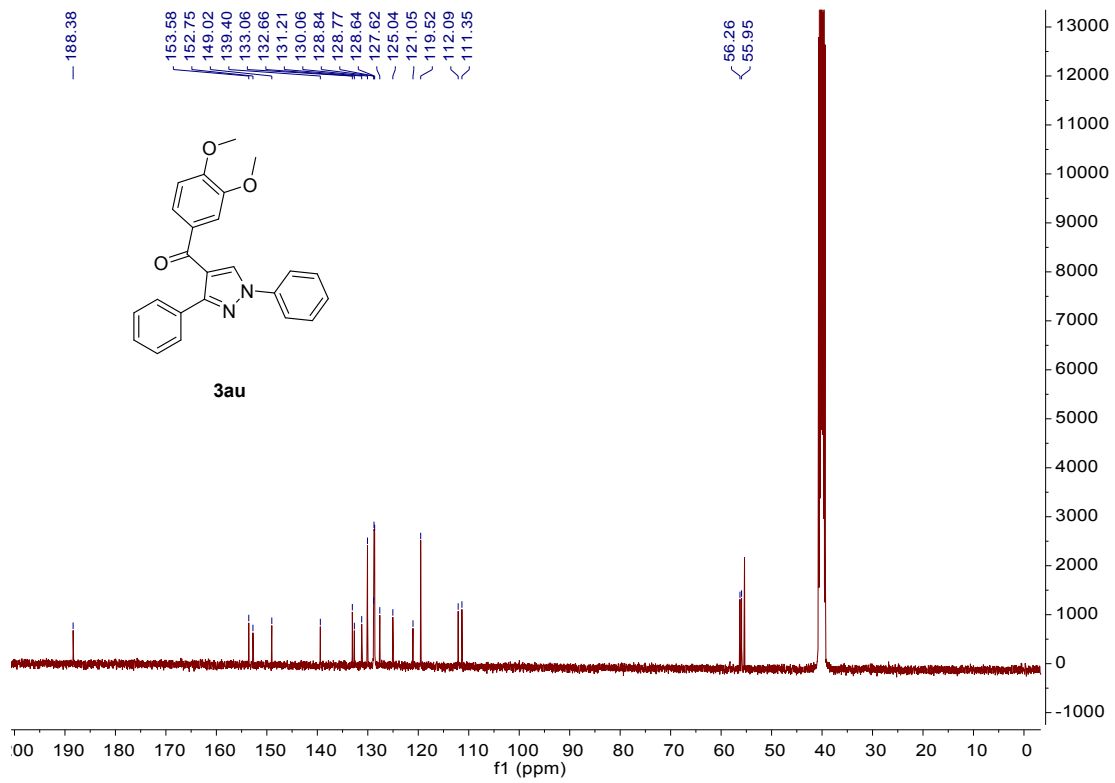

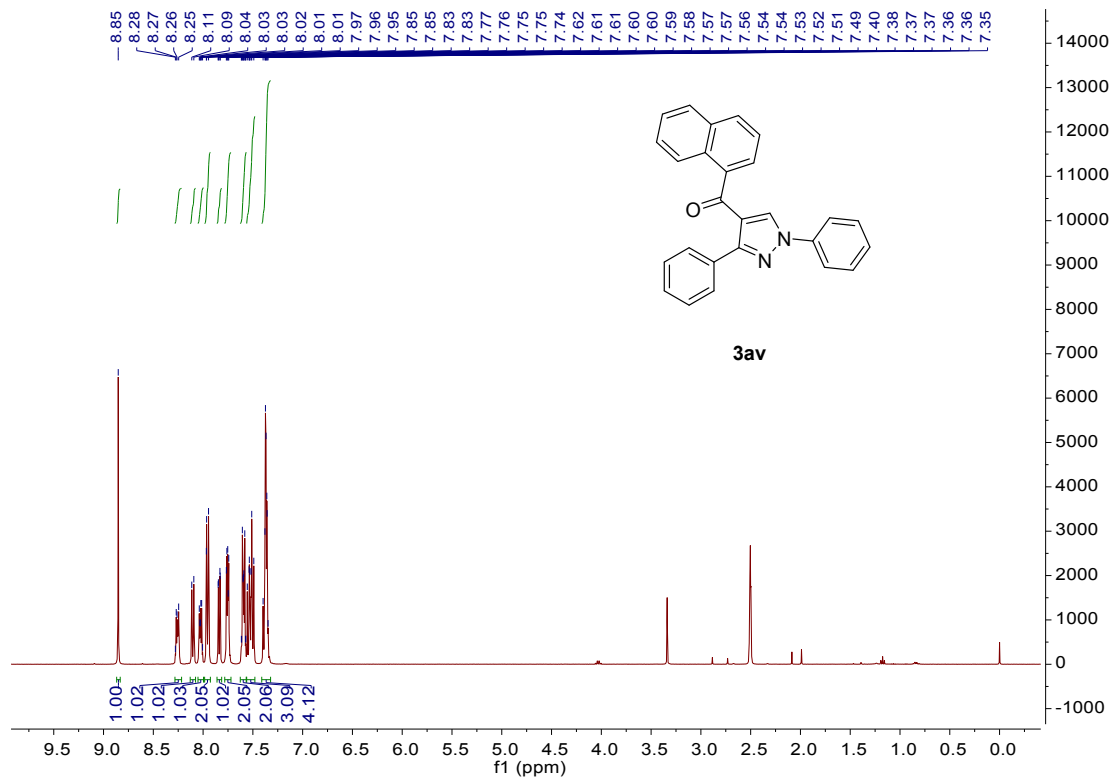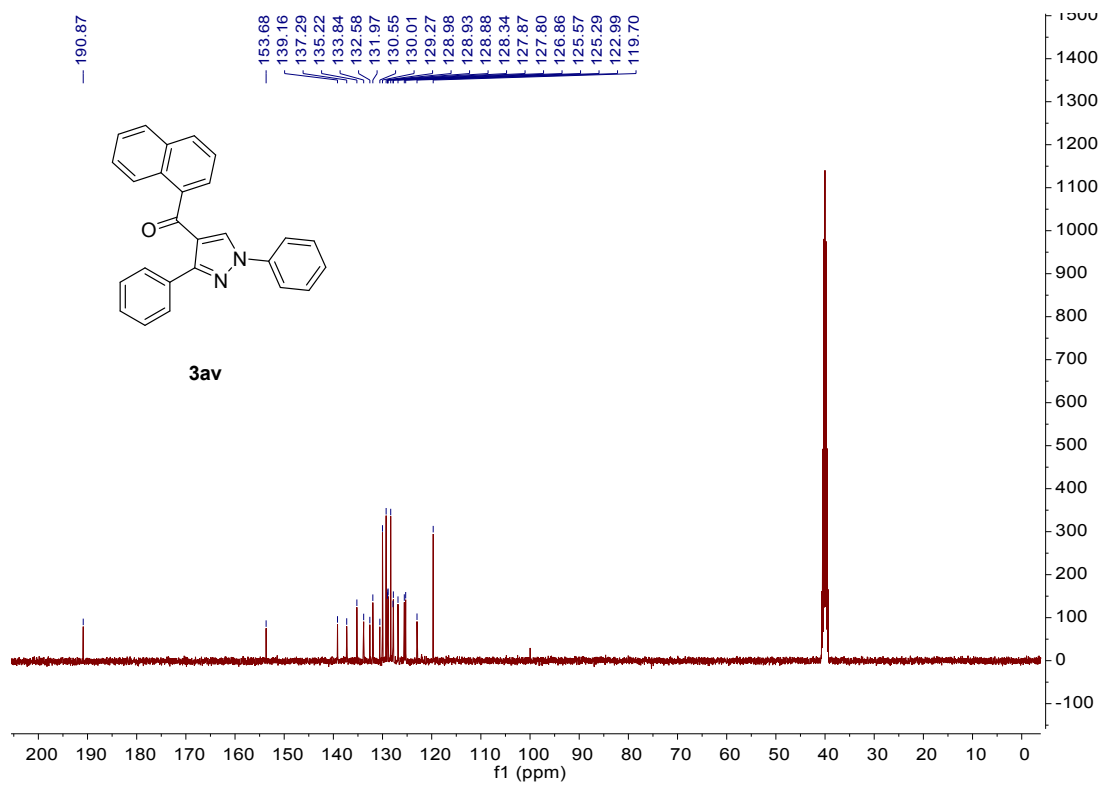

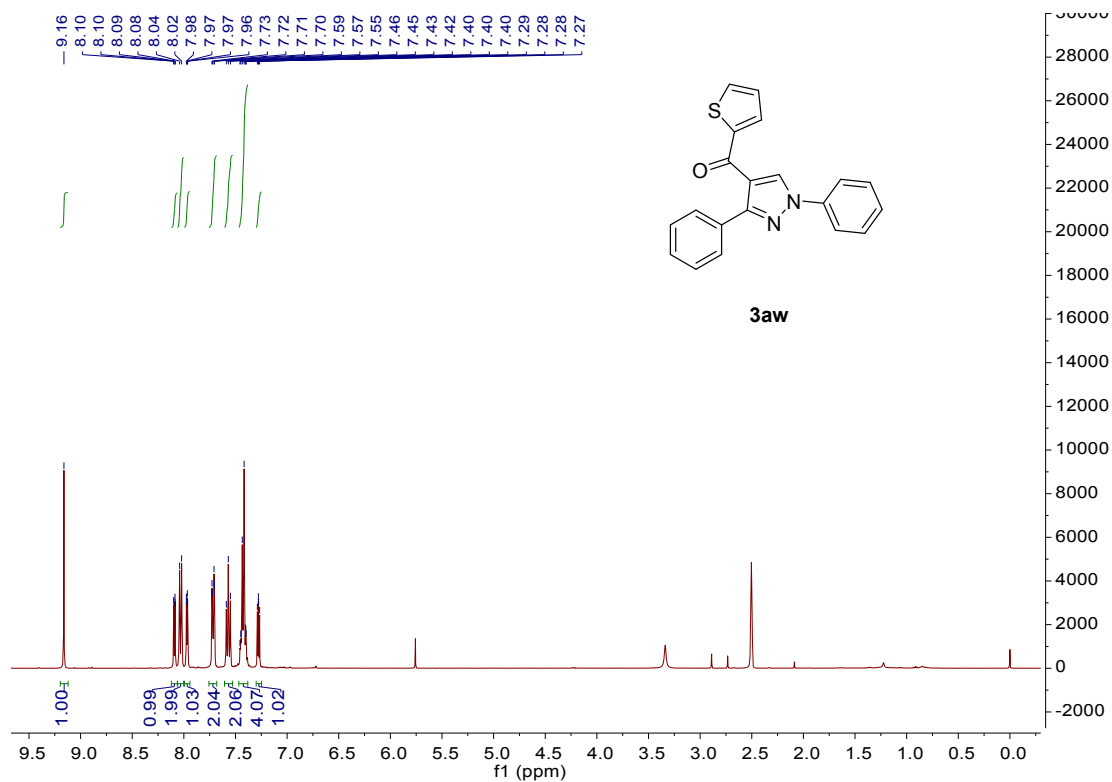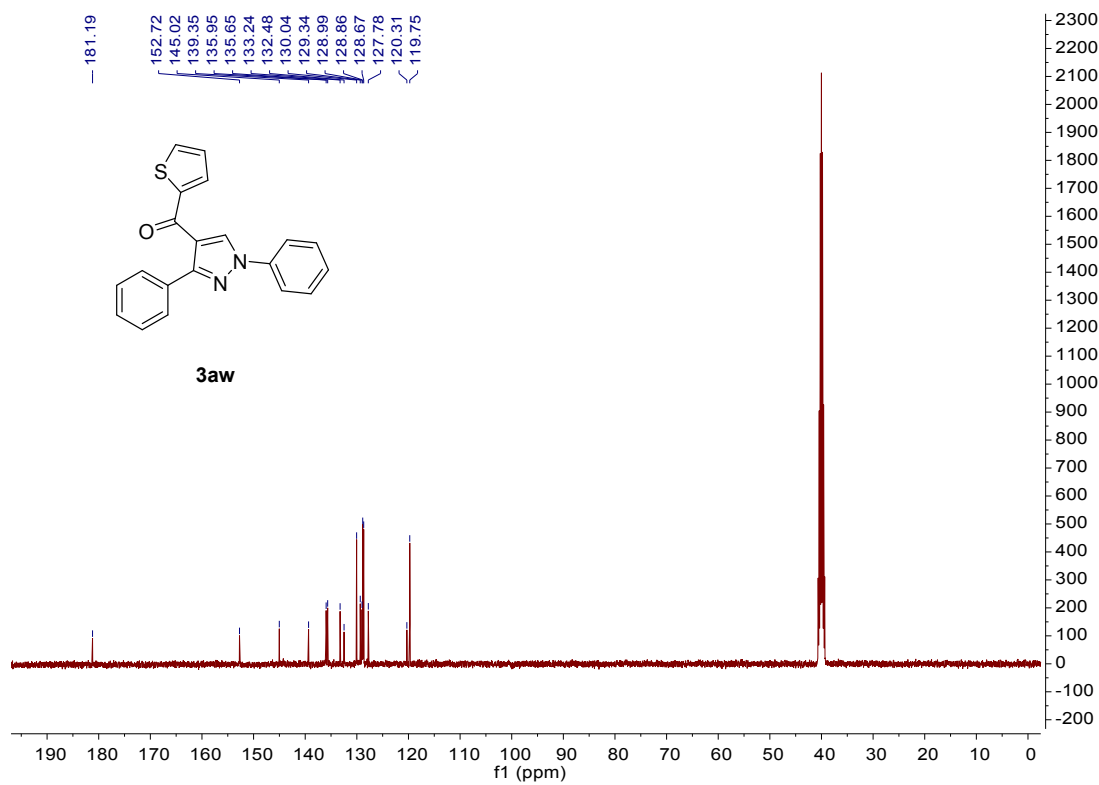

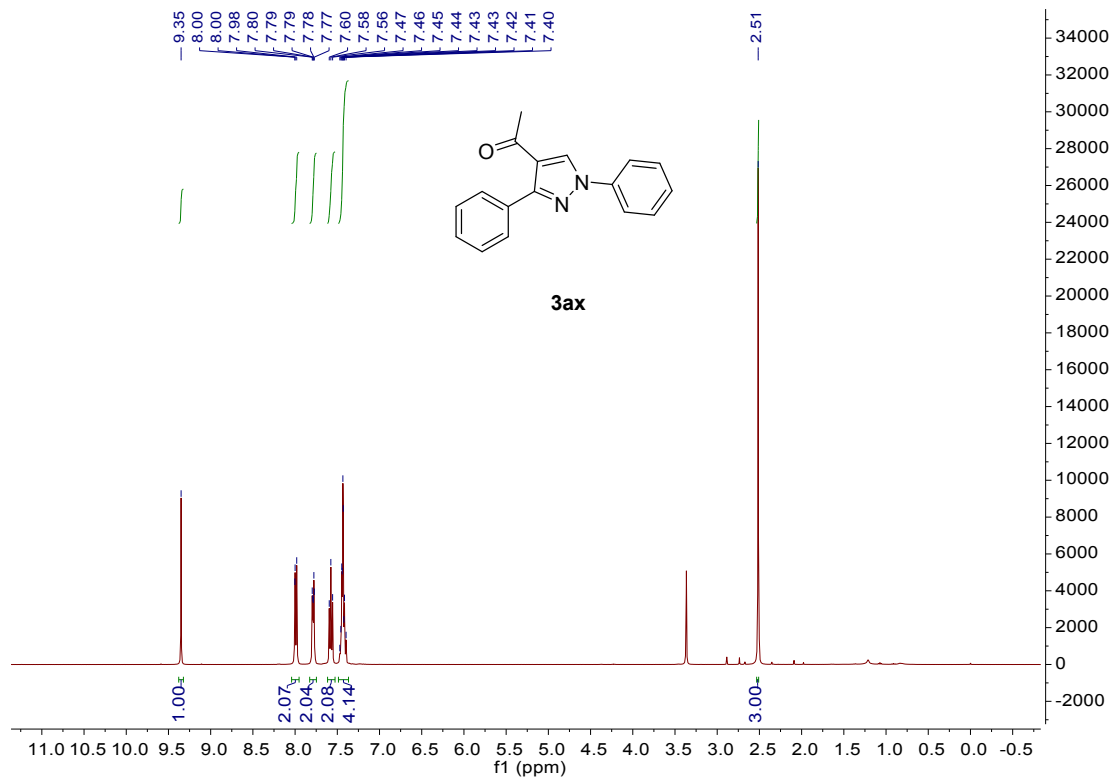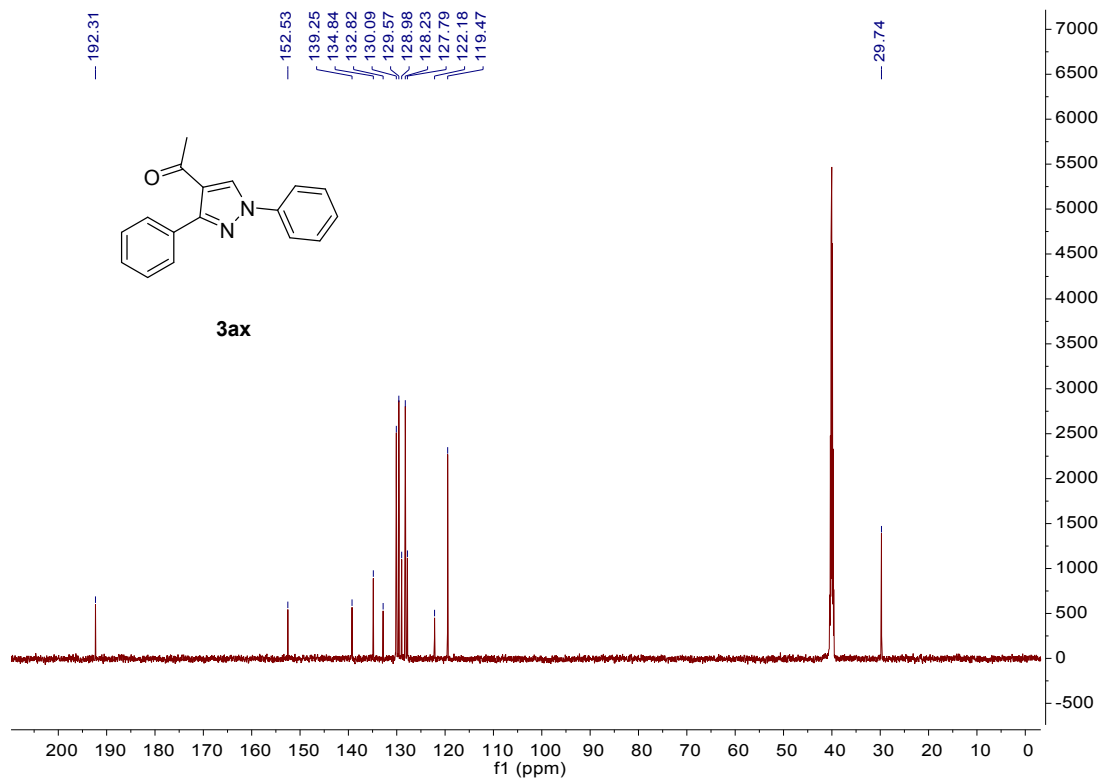



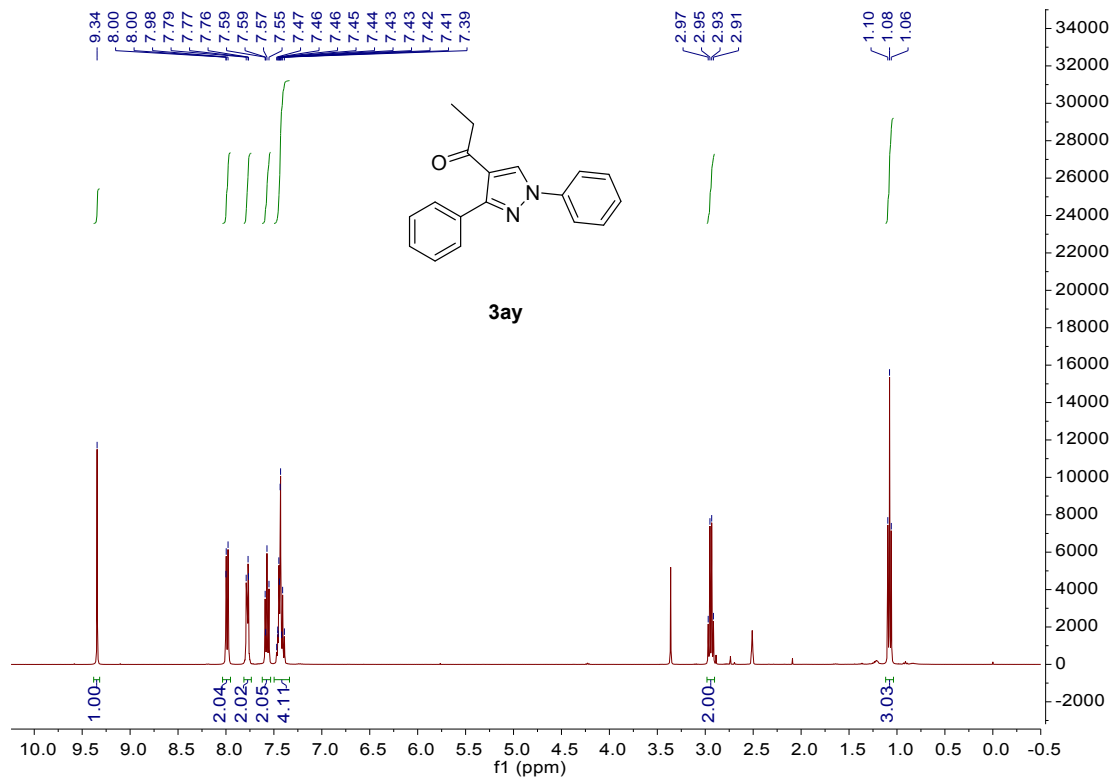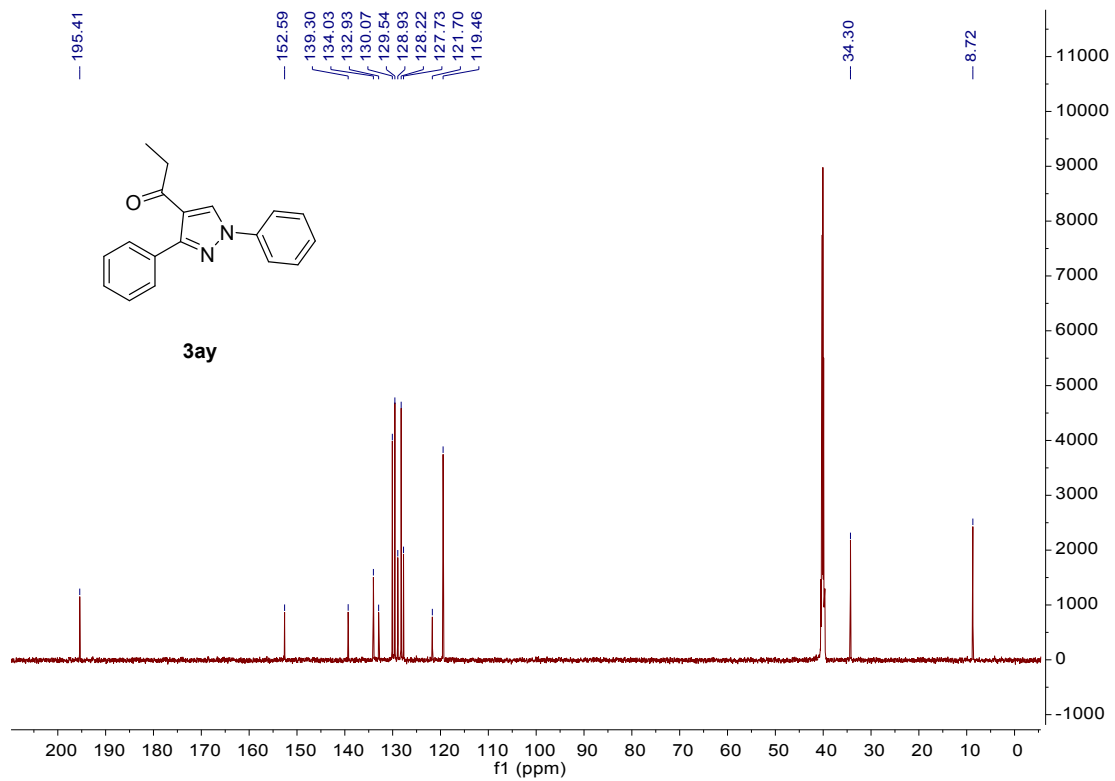

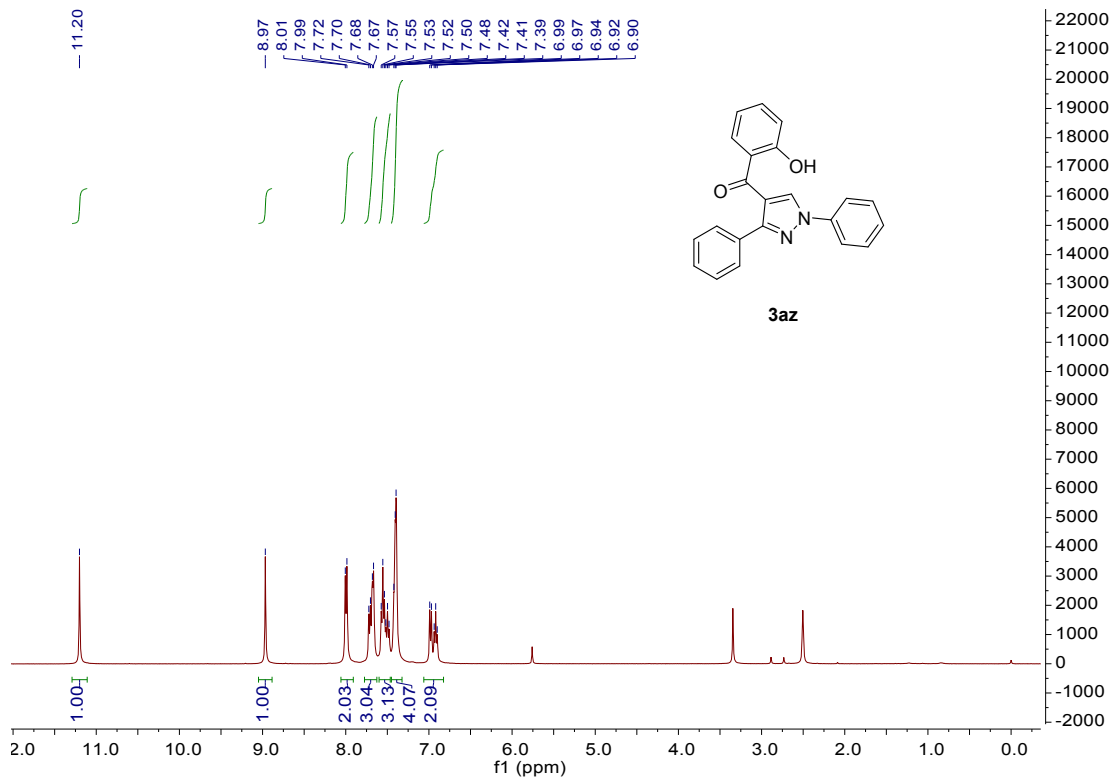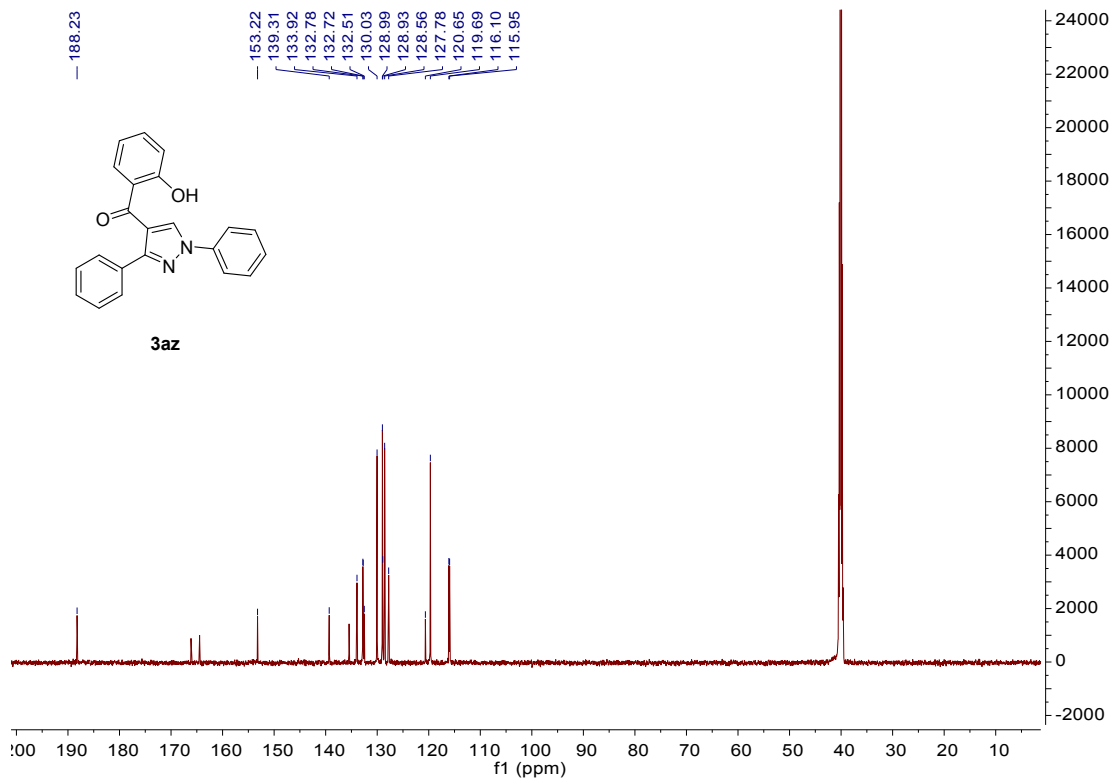

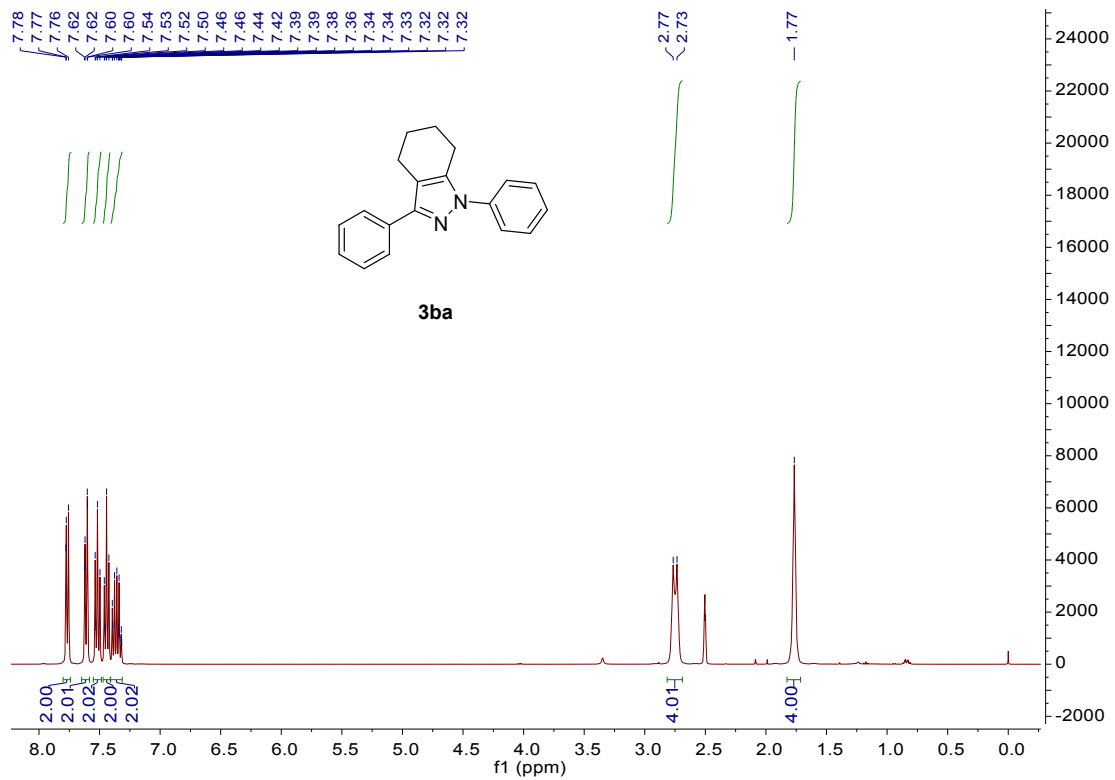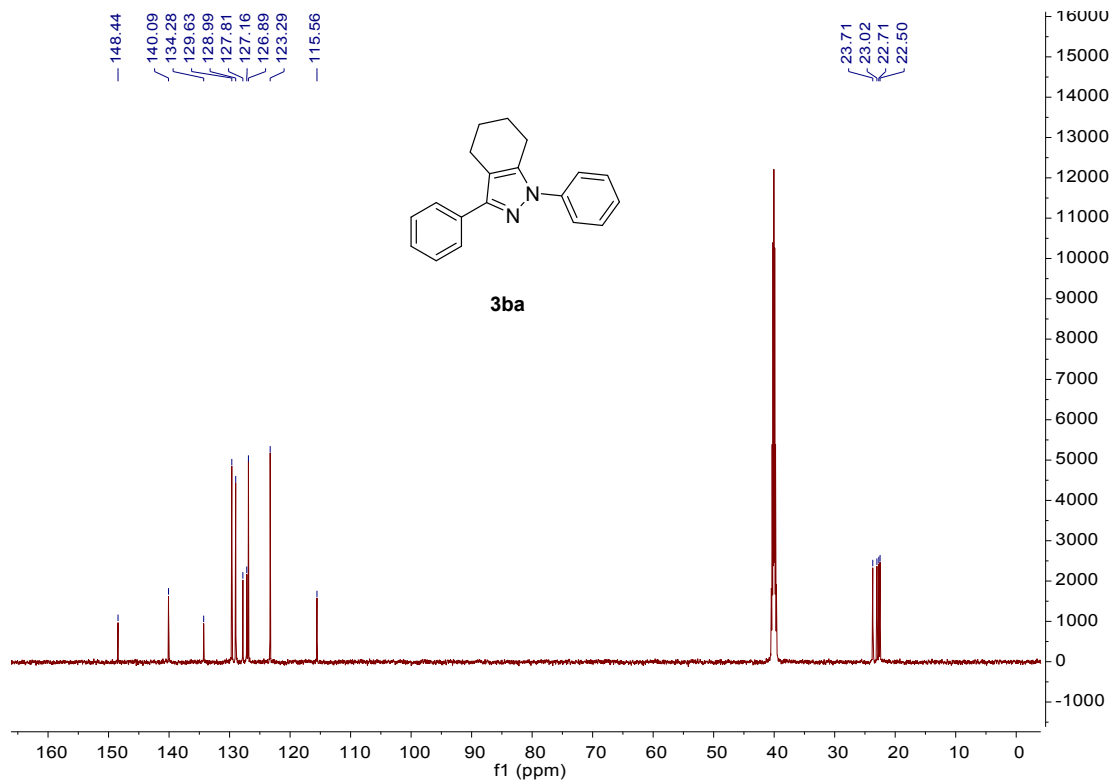

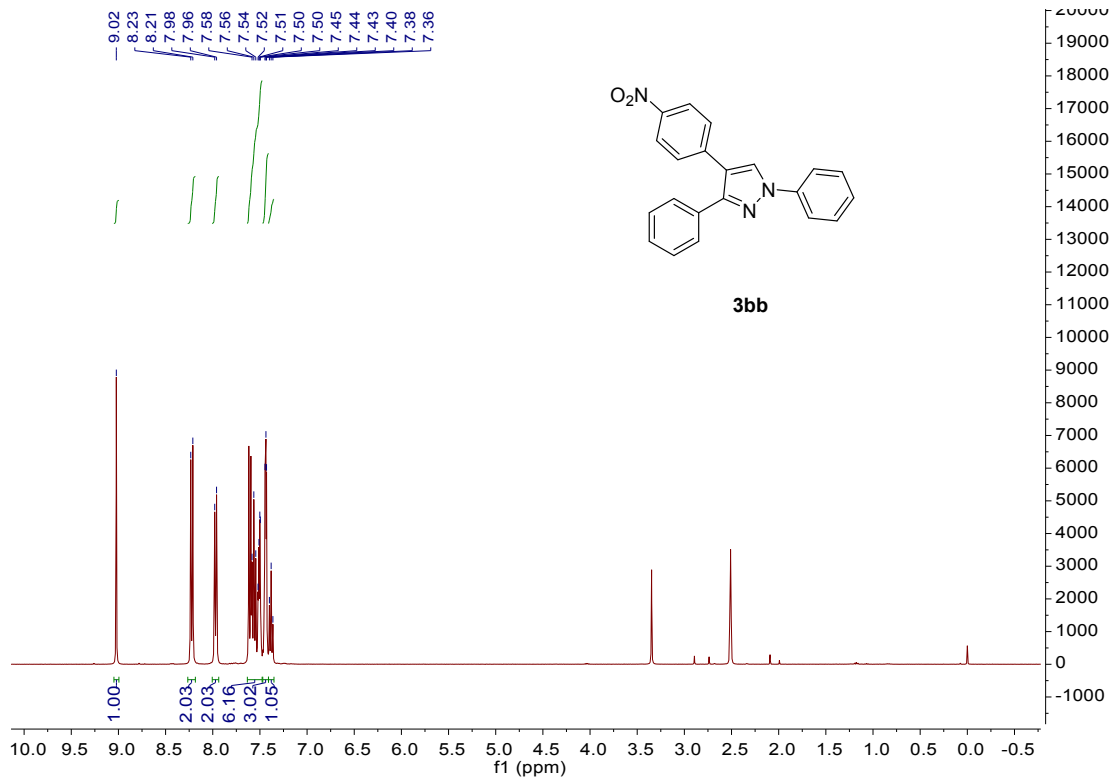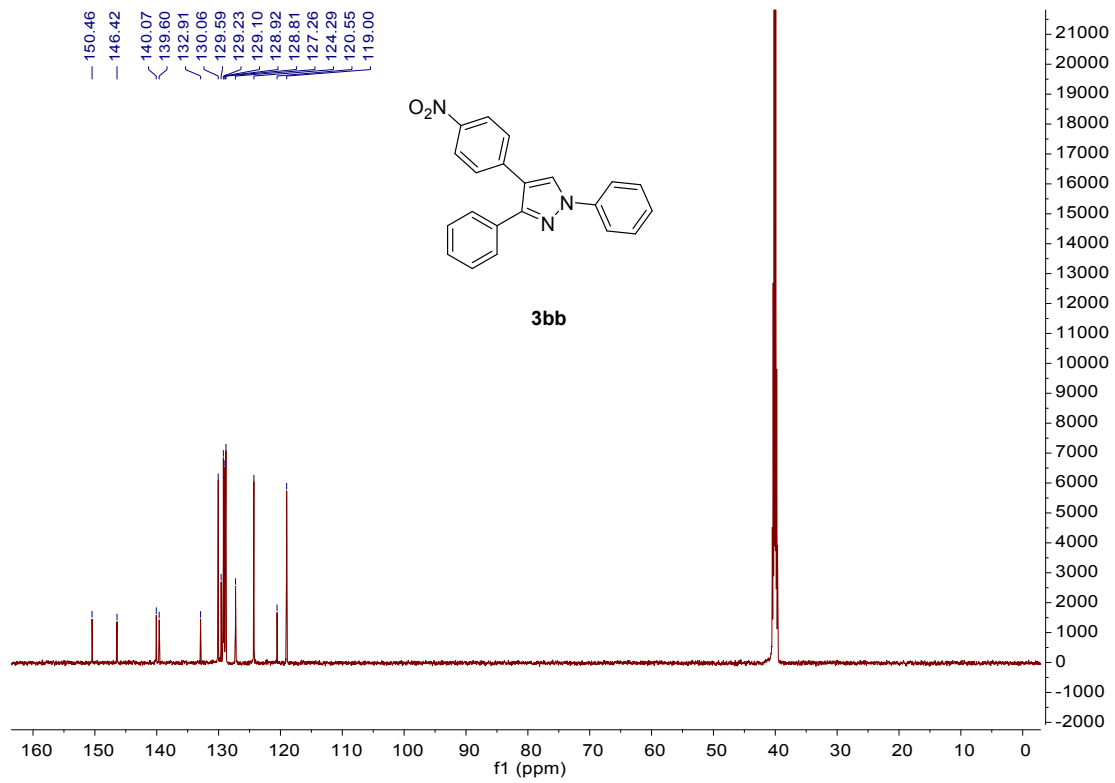

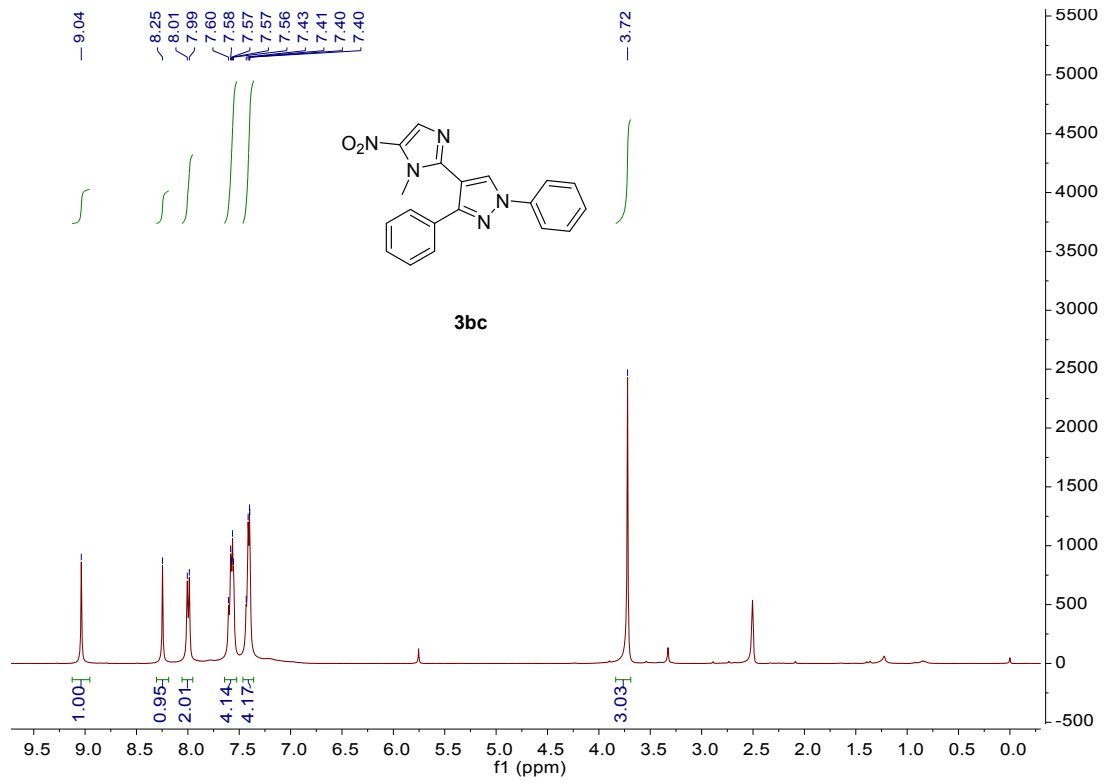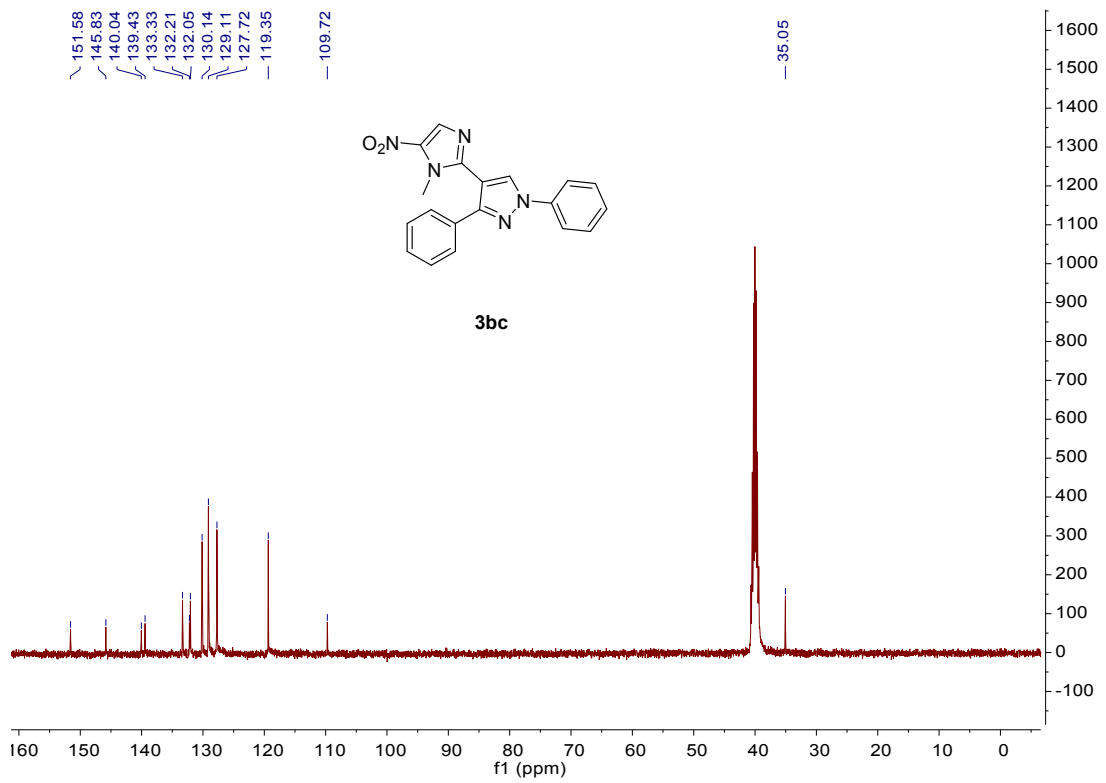

## Notes and references

- 1 G.Vantomme, S.M. Jiang and J.M. Lehn, *J. Am. Chem. Soc.*, 2014, **136**, 9509–9518.
- 2 N. Jebli, W. Debrouwerb, J. K. E. T. Bertonb, K. V. Heckec, C.V. Stevensb and S. Touila, *Synlett*, 2017, **28**, 1160-1164.
- 3 S. N. Milik, A. K. Abdel-Aziz, D. S. Lasheen, R. A.T. Serya, S. Minucci, K.A.M. Abouzid, *European Journal of Medicinal Chemistry.*, 2018, **155**, 316-336.
- 4 J. D. Albright, R. G. Shepherd, *Journal of Heterocyclic Chemistry.*, 1973, **10**, 899-907.
- 5 F. Ma, J. Liu, T.T. Zhou, M. Lei, J. Chen, X.C. Wang, Y. N. Zhang, X. Shen, L. H. Hu, *European Journal of Medicinal Chemistry.*, 2018, **152**, 307-317.
- 6 J. Boyer, E. Arnoult, M. Médebielle, J. Guillemont, J. Unge, and D. Jochmans, *Journal of Medicinal Chemistry.*, 2011, **54**, 7974-7985.
